# 1 A hydrophobic funnel governs 2 monovalent cation selectivity in the 3 ion channel TRPM5

4 Callum M. Ives <sup>1,2</sup>, Alp Tegin Şahin <sup>1,3</sup>, Neil J. Thomson <sup>1</sup>, Ulrich  
5 Zachariae <sup>1,4</sup> 

6 <sup>1</sup>Computational Biology, School of Life Sciences, University of Dundee, Dow Street,  
7 Dundee, UK.; <sup>3</sup>School of Medicine, University of St Andrews, St Andrews, UK.;

8 <sup>4</sup>Biochemistry and Drug Discovery, School of Life Sciences, University of Dundee, Dow  
9 Street, Dundee, UK.

10  **For correspondence:**

[u.zachariae@dundee.ac.uk](mailto:u.zachariae@dundee.ac.uk)

**Present address:**

<sup>2</sup>Department of Chemistry  
and Hamilton Institute,  
Maynooth University,  
Maynooth, Co. Kildare,  
Ireland.

**Data availability:** MD

simulation inputs and analysis  
scripts used for this study are  
deposited in a public GitHub  
repository, available at:  
[https://github.com/cmives/  
Na\\_selectivity\\_mechanism\\_  
of\\_TRPM\\_channels](https://github.com/cmives/Na_selectivity_mechanism_of_TRPM_channels).

**Funding:** CMI was supported  
by the Medical Research  
Council [grant number  
MR/N013735/1], NJT and ATŞ  
were supported by the UKRI  
Biotechnology and Biological  
Sciences Research Council  
(BBSRC) [grant numbers  
BB/M010996/1 and  
BB/T00875X/1, respectively].

**Competing interests:** The  
authors declare no competing  
interests.

11 **Abstract**

12 A key capability of ion channels is the facilitation of selective permeation of certain ionic species  
13 across cellular membranes at high rates. Due to their physiological significance, ion channels are  
14 of great pharmaceutical interest as drug targets. The polymodal signal-detecting Transient  
15 Receptor Potential (TRP) superfamily of ion channels form a particularly promising group of drug  
16 targets. While most members of this family permeate a broad range of cations including Ca<sup>2+</sup>,  
17 TRPM4 and TRPM5 are unique due to their strong monovalent-selectivity and impermeability for  
18 divalent cations. Here, we investigated the mechanistic basis for their unique  
19 monovalent-selectivity by *in silico* electrophysiology simulations of TRPM5. Our simulations reveal  
20 an unusual mechanism of cation selectivity, which is underpinned by the function of the central  
21 channel cavity rather than the selectivity filter. Our results suggest that a subtle hydrophobic  
22 barrier at the cavity entrance ("hydrophobic funnel") enables monovalent, but not divalent  
23 cations to pass and occupy the cavity at physiologically relevant membrane voltages. Monovalent  
24 cations then permeate efficiently by a co-operative, distant knock-on mechanism between two  
25 binding regions in the extracellular pore vestibule and the central cavity. By contrast, divalent  
26 cations do not enter or interact favourably with the channel cavity due to its raised  
27 hydrophobicity. Hydrophilic mutations in the transition zone between the selectivity filter and the  
28 central channel cavity abolish the barrier for divalent cations, enabling both monovalent and  
29 divalent cations to traverse TRPM5.

## 31 Introduction

32 The translocation of ions across cellular and organellar membranes via ion channels is essential to  
33 ensure cellular ionic homeostasis and provides a key pathway of intra- and intercellular communi-  
34 cation. Ion channels catalyse the permeation of ions across the membrane up to an order of  $10^8$   
35 ions per second, while at the same time often displaying strict selectivity for particular ionic species  
36 (*Dudev and Lim, 2014; Roux, 2017; Kopec et al., 2018*). The transient receptor potential (TRP) super-  
37 family of ion channels comprises a large group of cation-selective channels that are implicated in  
38 a wide range of physiological processes (*Ramsey et al., 2006; Khalil et al., 2018*). Due to their phys-  
39 iological importance, TRP channels are associated with a large number of pathological conditions  
40 (*Nilius, 2007*), including in the aetiology of several rare, genetic conditions. Many members of the  
41 TRP channel superfamily constitute major pharmaceutical target proteins (*Moran, 2018; Koivisto*  
42 *et al., 2022*).

43 Within the TRP channel superfamily, TRPM (transient receptor potential melastatin) channels  
44 form the largest subfamily, consisting of eight members (TRPM1-8) (*Nilius and Owsianik, 2011;*  
45 *Samanta et al., 2018*). TRPM channels assemble as homotetramers, in which each subunit provides  
46 six transmembrane helices (S1-S6), a cytosolic N-terminus domain composed of four melastatin  
47 homology regions, and a cytosolic C-terminus coiled-coil domain (*Hilton et al., 2019; van Goor*  
48 *et al., 2020*). In keeping with most members of the TRP superfamily, TRPM channels are described  
49 as being cation non-selective, that is, they conduct cations but do not differentiate substantially  
50 between cationic species. However in the TRPM subfamily, TRPM4 and TRPM5 are exceptions to  
51 this observation, since both channels are selective for monovalent cations and impermeable to  
52 divalent cations (*Owsianik et al., 2006*). Thereby, TRPM4 and TRPM5 are the only members of the  
53 wider TRP superfamily to display selectivity for monovalent cations.

54 Although TRPM4 and TRPM5 are close homologs, sharing both a high degree of sequence ho-  
55 mology and similar biophysical characteristics, there are some variations in their activation mecha-  
56 nisms. For example, while both channels are activated by raised intracellular  $\text{Ca}^{2+}$  concentrations,  
57 TRPM5 is approximately 20-fold more sensitive to  $\text{Ca}^{2+}$  than TRPM4 (*Ullrich et al., 2005*). Ion con-  
58 duction through TRPM5 has been implicated in the sensation of sweet, bitter, and umami tastes  
59 in type II taste bud cells (*Pérez et al., 2002; Zhang et al., 2003*), and in the secretion of insulin by  
60 pancreatic  $\beta$ -cells (*Brixel et al., 2010; Colsoul et al., 2010*). Consequently, TRPM5 is a potential drug  
61 target for a number of conditions, including metabolic conditions such as type II diabetes mellitus  
62 (*Vennekens et al., 2018*). Several molecular structures of the TRPM4 and TRPM5 channels have  
63 been published to date, however an open-state structure has only been solved for TRPM5 (*Ruan*  
64 *et al., 2021*).

65 In the present work, we set out to characterise the cation permeation mechanism of the TRPM5  
66 channel, focusing in particular on the basis for its monovalent cation selectivity, by conducting  
67 atomistic molecular dynamics (MD) simulations and *in silico* electrophysiology of the open-state  
68 structure of *Danio rerio* TRPM5 (*Ruan et al., 2021*) (PDB ID: 7MBS) in solutions of  $\text{Na}^+$ ,  $\text{K}^+$ , and  $\text{Ca}^{2+}$   
69 ions. We recorded more than 700 individual ion permeation events from over 20  $\mu\text{s}$  of aggregated  
70 time from our *in silico* electrophysiology simulations.

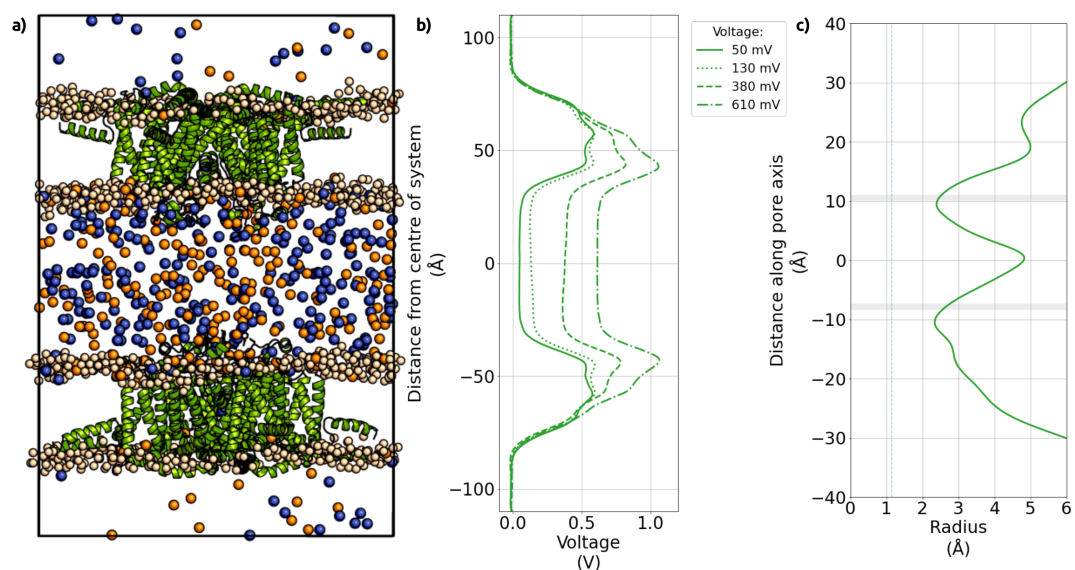

**Figure 1.** Structure and membrane voltage of CompEL simulations of TRPM5. **a)** Snapshot of the CompEL system showing the TRPM5 pore domain of *Danio rerio* used in this study inserted into a double bilayer simulation system in an anti-parallel fashion so that both proteins experience identical voltage polarity. Cations within the aqueous compartments are shown as spheres (orange: calcium; blue: sodium), highlighting the 9:1 ion concentration gradient between the compartments. **b)** The CompEL charge differences we applied across the aqueous compartments ( $\Delta q$ ) resulted in transmembrane voltages of  $\sim -50$  mV,  $-130$  mV,  $-380$  mV, and  $-610$  mV in addition to the concentration gradient. **c)** Average pore radius of TRPM5 along the pore axis from MD simulations. The regions in grey shade represent the average positions of the major pore constrictions in TRPM5, formed by Q906 (*upper gate*) and I966 (*lower gate*). The dashed line indicates the radius of a completely dehydrated Ca<sup>2+</sup> ion for comparison.

71 Our findings reveal a new mechanism of ion selectivity, based on a hydrophobic barrier at the  
72 entrance to the central channel cavity, which shields the cavity from an influx of divalent cations.  
73 In this way, the central cavity forms a binding site for monovalent cations, but not for divalent  
74 cations. The conduction of monovalent ions thus becomes a synergistic process incorporating co-  
75 operativity between multiple binding sites.

## 76 Methods & Materials

### 77 TRPM5 system construction

78 A truncated TRPM5 simulation system consisting of the membrane-domain of the channel was  
79 constructed by using residues 698-1020, including the resolved *N*-acetyl- $\beta$ -D-glucosamine of the  
80 glycosylated N921 residue, of the *Danio rerio* TRPM5 structure (Ruan *et al.*, 2021) (PDB ID: 7MBS).  
81 We also modelled the bound Ca<sup>2+</sup> cations occupying the Ca<sub>TMD</sub> binding sites at E768 and D797 in  
82 each subunit, which have been proposed to be implicated in Ca<sup>2+</sup>-dependent activation of TRPM5.  
83 The system was built using the CHARMM-GUI server (Jo *et al.*, 2008). The charged *N*- and *C*-terminal  
84 residues were neutralised by capping with acetyl (ACE) and *N*-methylamide (CT3) groups, respec-  
85 tively. All missing non-terminal residues were modelled using CHARMM-GUI (Jo *et al.*, 2014).

86 The structure was aligned in the membrane using the PPM server (Lomize *et al.*, 2012), inserted

87 into a 1-palmitoyl-2-oleoyl-sn-glycerol-3-phosphocholine (POPC) bilayer of 160 x 160 Å size with  
88 the CHARMM-GUI membrane builder (Jo *et al.*, 2007; Wu *et al.*, 2014), and then solvated. Ions  
89 were added with GROMACS 2020.2 (Abraham *et al.*, 2015; Lindahl *et al.*, 2020) to neutralise any  
90 system charges and add ions to a concentration of either 150 mM NaCl, 150 mM KCl, 150 mM CaCl<sub>2</sub>  
91 (referred to as mono-cationic solutions), or a mixture of 75 mM NaCl and 75 mM CaCl<sub>2</sub> (referred  
92 to as di-cationic solutions). In the case of simulations containing Ca<sup>2+</sup>, the standard CHARMM36m  
93 parameters for Ca<sup>2+</sup> ions were then replaced with the multi-site Ca<sup>2+</sup> of Zhang *et al.* (Zhang *et al.*,  
94 2020). This multi-site model has been used to investigate Ca<sup>2+</sup> permeation in a number of  
95 channels, including including the type-1 ryanodine receptor Zhang *et al.* (2020); Liu *et al.* (2021),  
96 AMPA receptors (Schackert *et al.*, 2022), the E protein of SARS-CoV-2 (Antonides *et al.*, 2022), and  
97 TRPV channels (Liu and Song, 2022; Ives *et al.*, 2023).

### 98 **Molecular dynamics simulation details**

99 All simulations were performed using GROMACS 2020.2 (Abraham *et al.*, 2015; Lindahl *et al.*, 2020)  
100 or GROMACS 2022 (Bauer *et al.*, 2022), together with the CHARMM36m force field for the protein,  
101 lipids, and ions (except for Ca<sup>2+</sup> as noted above) (Huang *et al.*, 2016). The TIP3P water model was  
102 used to model solvent molecules (Jorgensen *et al.*, 1983). The system was minimised and equi-  
103 librated using the suggested equilibration input scripts from CHARMM-GUI (Lee *et al.*, 2016). In  
104 brief, the system was equilibrated using the NPT ensemble for a total time of 1.85 ns with the  
105 force constraints on the system components being gradually released over six equilibration steps.  
106 The systems were then further equilibrated by performing a 15 ns simulation with no electric field  
107 applied. To prevent closing of the lower hydrophobic gate of the pore, harmonic restraints were ap-  
108 plied to maintain the distance between the  $\alpha$ -carbon atoms of the lower gate residue I966 of each  
109 respective chain. The temperature was maintained at T = 310 K using the Nosé-Hoover thermostat  
110 (Evans and Holian, 1985), and the pressure was maintained semi-isotropically at 1 bar using the  
111 Parrinello-Rahman barostat (Parrinello and Rahman, 1981). Periodic boundary conditions were  
112 used throughout the simulations. Long-range electrostatic interactions were modelled using the  
113 particle-mesh Ewald method (Darden *et al.*, 1993) with a cut-off of 12 Å. The LINCS algorithm (Hess  
114 *et al.*, 1997) was used to constrain bond lengths involving bonds with hydrogen atoms. Hydrogen  
115 mass re-partitioning (HMR) of the system was used to allow the use of 4 fs integration time steps in  
116 simulations of NaCl solutions. The multi-site Ca<sup>2+</sup> model used for simulations of CaCl<sub>2</sub> however is  
117 incompatible with a 4-fs time step, and therefore any simulations involving Ca<sup>2+</sup> cations were per-  
118 formed with HMR but at a time step of 2-fs. A summary of all simulations performed is presented  
119 in Table 1, and in more detail in Tables S1 and S2.

### 120 **CompEL simulations**

121 We employed the computational electrophysiology (CompEL) protocol (Kutzner *et al.*, 2011, 2016)  
122 of GROMACS to create a transmembrane voltage and drive ion permeation in an anti-parallel dou-  
123 ble membrane system, such that both channels experienced the same voltage polarity with neg-  
124 ative polarity in the intracellular region. Simulations were performed in a di-cationic solution of  
125 75 mM NaCl and 75 mM CaCl<sub>2</sub> with a range of ionic imbalances ( $\Delta q$ ), resulting in membrane volt-

**Table 1.** Summary of simulations performed in this study.

| Protein        | Transmembrane voltage methodology | Voltage                  | Ion solution                            | Simulation duration |
|----------------|-----------------------------------|--------------------------|-----------------------------------------|---------------------|
| TRPM5          | CompEL<br>(anti-parallel)         | -50 mV                   | 75 mM NaCl +<br>75 mM CaCl <sub>2</sub> | 3 x 500 ns          |
|                |                                   | -160 mV                  | 75 mM NaCl +<br>75 mM CaCl <sub>2</sub> | 3 x 500 ns          |
|                |                                   | -380 mV                  | 75 mM NaCl +<br>75 mM CaCl <sub>2</sub> | 3 x 500 ns          |
|                |                                   | -610 mV                  | 75 mM NaCl +<br>75 mM CaCl <sub>2</sub> | 3 x 500 ns          |
|                | External applied<br>field         | -50 mV                   | 150 mM NaCl                             | 3 x 250 ns          |
|                |                                   |                          | 150 mM CaCl <sub>2</sub>                | 3 x 250 ns          |
|                |                                   | -200 mV                  | 150 mM NaCl                             | 3 x 250 ns          |
|                |                                   |                          | 150 mM CaCl <sub>2</sub>                | 3 x 250 ns          |
|                |                                   | -340 mV                  | 150 mM NaCl                             | 3 x 250 ns          |
|                |                                   |                          | 150 mM CaCl <sub>2</sub>                | 3 x 250 ns          |
| TRPM5<br>F904T | -130 mV                           | 150 mM NaCl              | 3 x 250 ns                              |                     |
|                |                                   | 150 mM CaCl <sub>2</sub> | 3 x 250 ns                              |                     |
|                | -200 mV                           | 150 mM NaCl              | 3 x 250 ns                              |                     |
|                |                                   | 150 mM CaCl <sub>2</sub> | 3 x 250 ns                              |                     |

126 ages of ~ -50 mV, -130 mV, -380 mV, and -610 mV. To further drive cation permeation, we also  
 127 generated a neutral ion concentration gradient of 9:1 between the extracellular and intracellular  
 128 solutions (Figure 1). All CompEL simulations were 500 ns long and repeated three times for each  
 129 system, resulting in an aggregated simulation time of 3  $\mu$ s per membrane voltage due to the double  
 130 channel nature of these simulations.

### 131 External applied field simulations

132 In addition to CompEL simulations, we also performed simulations in mono-cationic solutions of  
 133 150 mM NaCl, 150 mM KCl, and 150 mM CaCl<sub>2</sub>, using an applied electric field to produce membrane  
 134 voltage *Aksimentiev and Schulten (2005)*. Fields of -0.03, -0.0175, or -0.0044 V nm<sup>-1</sup> were applied,  
 135 resulting in transmembrane voltage of ~-340 mV, 2-00 mV, or -50 mV, respectively, with negative  
 136 polarity in the intracellular region. All applied field simulations were 250 ns long and repeated  
 137 three times for each system.

### 138 Simulation analysis

139 Analysis of MD trajectory data was performed using in-house written Python scripts, utilising GRO-  
 140 MACS modules (*Abraham et al., 2015; Lindahl et al., 2020*), the SciPy library of tools (*Oliphant, 2007*;

141 *Pérez and Granger, 2007; Millman and Aivazis, 2011; Van Der Walt et al., 2011*), and MDAnalysis  
142 (*Michaud-Agrawal et al., 2011; Gowers et al., 2016*). Analysis of the pore architecture was per-  
143 formed using CHAP (*Rao et al., 2019*). All plots were generated in Python using Matplotlib (*Hunter,*  
144 *2007*) and Seaborn (*Waskom et al., 2018*). All MD input and analysis scripts used for this study  
145 are deposited in a public GitHub repository, available at: [https://github.com/cmives/Na\\_selectivity\\_](https://github.com/cmives/Na_selectivity_mechanism_of_TRPM_channels)  
146 [mechanism\\_of\\_TRPM\\_channels](https://github.com/cmives/Na_selectivity_mechanism_of_TRPM_channels).

147 Calculating conductance and selectivity from *in silico* electrophysiology experiments  
148 The conductance of the channels ( $C_{ion}$ ) was calculated according to Equation 1, where  $N_p$  is the  
149 number of permeation events,  $Q_{ion}$  is the charge of the permeating ion in Coulomb,  $t_{traj}$  is the length  
150 of the trajectory, and  $V_{tm}$  is the transmembrane voltage. The mean conductance and standard error  
151 were calculated from overlapping 50 ns windows of the trajectory.

$$C_{ion} = \frac{N_p \times Q_{ion}}{t_{traj} \times V_{tm}} \quad (1)$$

152 The selectivity ( $P_{Na}/P_{Ca}$ ) from the di-cationic CompEL simulations was calculated as the ratio  
153 between the total sum of  $Na^+$  permeation events and the total sum of  $Ca^{2+}$  permeation events  
154 across all simulations in a certain voltage or concentration regime.

155 Identification of cation binding sites from MD simulations of TRPV channels

156 Cation binding sites were identified by plotting timeseries of each permeating ion with respect  
157 to their position along the pore axis. To further validate these positions, a 3D density mesh was  
158 generated for cations within 10 Å of the protein. This analysis was performed on a trajectory of  
159 concatenated, three-fold replicated 500 ns simulations in mono-cationic solutions with a voltage  
160 of ~ -50 mV produced by the CompEL method.

161 Characterising permeation cooperativity through mutual information with SSI from PENSAs

162 To characterise the level of co-operativity of the ion permeation mechanisms within the TRPM5  
163 channel, we used PENSAs to calculate the state-specific information (SSI) shared between discrete  
164 state transitions in the occupancy distributions of both of the pore binding sites *Thomson et al.*  
165 *(2021); Vögele et al. (2022)*. The methodology has been described in greater detail in our previous  
166 work *Ives et al. (2023)*.

167 In brief, a timeseries distribution with a timestep of 20 ps for each binding site was obtained.  
168 For each frame, the ion's atom ID number was recorded if an ion occupied the binding site in this  
169 frame (occupied state). By contrast, if the binding site was unoccupied (vacant state), an ID of -1  
170 was recorded. We then quantified by mutual-information whether ion transitions from occupied  
171 to vacant, or vice versa, at one site were coupled to similar ion transitions at the second ion binding  
172 site. To account for statistical noise that can arise from distributions even if they are uncorrelated  
173 with one another due to small-batch effects (*McClendon et al., 2009; Pethel and Hahs, 2014*), we  
174 calculated a statistical noise threshold. This threshold level was subtracted from the measured SSI  
175 values to yield the excess mutual information, or excess SSI (*exSSI*) above noise.

## 176 Results

### 177 Cation conductance of the TRPM5 channel in di-cationic solutions

178 We performed *in silico* simulations of open state *Danio rerio* TRPM5 (Ruan *et al.*, 2021) embed-  
179 ded in a dual POPC lipid bilayer system, with a di-cationic solution of 135 mM NaCl and 135 mM  
180 CaCl<sub>2</sub> in the central dense aqueous compartment, and 15 mM NaCl and 15 mM CaCl<sub>2</sub> in the outer  
181 diluted aqueous compartments, respectively (Figure 1). An anti-parallel CompEL double bilayer  
182 setup (Kutzner *et al.*, 2011) was used to yield a bio-mimetic transmembrane voltage of ~ -50 mV  
183 across both embedded channels, as well as higher voltages of -130 mV, -380 mV and -610 mV to  
184 increase the number of permeation events and improve the statistics of our analyses (Figure 1).  
185 The 9:1 ion concentration gradient between the middle and the outside bulk compartment acted  
186 synergistically with the membrane voltage to drive ion permeation.

187 Our simulations showed a continuous flow of permeating ions, resulting in a total of 374 per-  
188 meation events across all investigated simulation conditions performed with the CompEL setup.  
189 Even though the ion gradient provided an additional driving force for permeation alongside the  
190 voltages, the calculated conductances from our *in silico* electrophysiology simulations, in a range  
191 between 7 and 38 pS (Table 2), were generally in good agreement with the published conductance  
192 values of 23–25 pS from *in vitro* electrophysiology experiments on TRPM5 in NaCl based solutions  
193 (Hofmann *et al.*, 2003; Prawitt *et al.*, 2003).

### 194 Low-voltage simulations in di-cationic solutions show exclusive permeation of Na<sup>+</sup> 195 through TRPM5

196 At the lowest simulated voltages of ~ -50 mV and -130 mV, we observed complete Na<sup>+</sup>-selectivity  
197 in mixed Ca<sup>2+</sup>/Na<sup>+</sup> solutions, with no recorded Ca<sup>2+</sup> permeation during an accumulated simulation  
198 time of 1.5 μs. During the same time span, 15 (-50 mV) and 18 Na<sup>+</sup> ions (-130 mV) traversed the  
199 TRPM5 pore, respectively, in accordance with its general conductance level (Table 2).

200 Analysis of the pore architecture of TRPM5 showed no major conformational changes through-  
201 out the course of the simulations. The TRPM5 pore possesses two main constrictions: an upper  
202 constriction formed by the sidechains of Q906 and by G905 of the three-residue selectivity filter  
203 (SF), and a lower constriction formed by the sidechains of I966 of the lower gate (Figure 1). A mi-  
204 nor constriction can also be observed ~13 Å above the SF, in the extracellular pore vestibule (EPV)  
205 (Figure 2). This constriction is formed by the turret loop between the pore helix (PH) and the S6  
206 helix.

207 In our simulations at -50 mV and -130 mV, Na<sup>+</sup> cations first entered the EPV region of the TRPM5  
208 pore, where they showed a broad association with the protein matrix. Permeating Na<sup>+</sup> cations  
209 then traversed the SF rapidly, and entered the pore cavity. They spent a substantial amount of time  
210 occupying the cavity before passing through the lower gate and exiting the pore at the intracellular  
211 face.

212 As opposed to monovalent Na<sup>+</sup>, Ca<sup>2+</sup> ions did not readily enter the inner pore of TRPM5 during  
213 the course of the simulations. Ca<sup>2+</sup> cations chiefly occupied the EPV region at the extracellular  
214 entrance (see Figure 2). 3D density maps of Na<sup>+</sup> and Ca<sup>2+</sup> ions further confirmed this observation

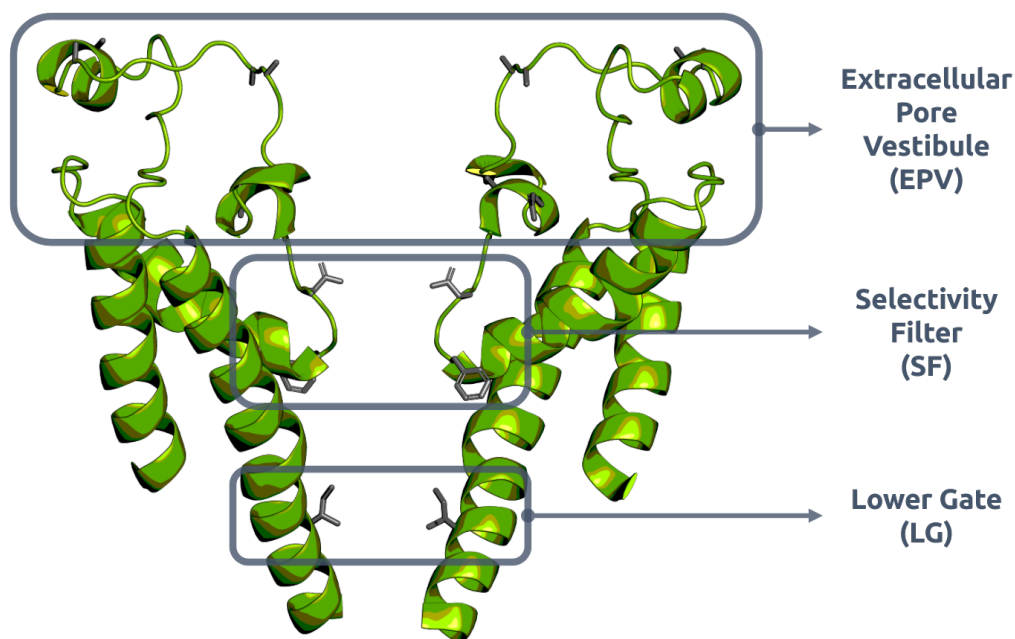

**Figure 2.** Overview of the structure of the TRPM5 channel of *Danio rerio* used in this work (two of the four subunits are omitted for clarity). TRPM5 has a short, three-residue selectivity filter (SF) consisting of Q906, G905, and F904. The hydrophobic lower gate (LG) of TRPM5 is formed by I966. In this study, the pore is defined as the region between the two constrictions of the channel, namely Q906 of the SF and I966 of the lower gate. Above the pore is the extracellular pore vestibule, which contains a number of acidic residues, such as E910, E911, D919, D920, D925, and E928. All residues mentioned by name are displayed as grey sticks.

215 (Figure 3). The maps show substantial  $\text{Ca}^{2+}$  density in the EPV, particularly near the acidic residues  
216 on the loop between the PH and the S6 helix, namely: E910, E911, D919, D920, D925, and E928. We  
217 observed that  $\text{Ca}^{2+}$  ions occasionally migrated from the EPV toward the pore, however they were  
218 blocked from entering the cavity at the SF, particularly at the constriction formed around G905 and  
219 F904 from each subunit (Figure 3).

### 220 **Voltage dependence of simulated TRPM5 ion selectivity**

221 As the membrane voltage was increased in our CompEL simulations, we observed the  $\text{Na}^+$  selectiv-  
222 ity ( $P_{\text{Na}}/P_{\text{Ca}}$ ) to be diminished (Table 2). At a voltage of both  $\sim -50$  mV and  $\sim -130$  mV, we recorded  
223 complete  $\text{Na}^+$ -selectivity, with no  $\text{Ca}^{2+}$  permeation events in any of the simulations. At a voltage  
224 of  $\sim -380$  mV, the *in silico* electrophysiology simulations continued to display slightly  $\text{Na}^+$ -selective  
225 permeation; however, when the voltage was further increased to  $\sim -610$  mV, the  $\text{Na}^+$ -selectivity  
226 was lost. Furthermore, higher-voltage simulations also yielded a small number of  $\text{Cl}^-$  permeation  
227 events, with anions permeating through to the extracellular solution.

228 Our findings suggest relatively weak cation binding sites within the pore domain, in line with  
229 the absence of negatively charged residues lining the SF and inner cavity, due to the substantial



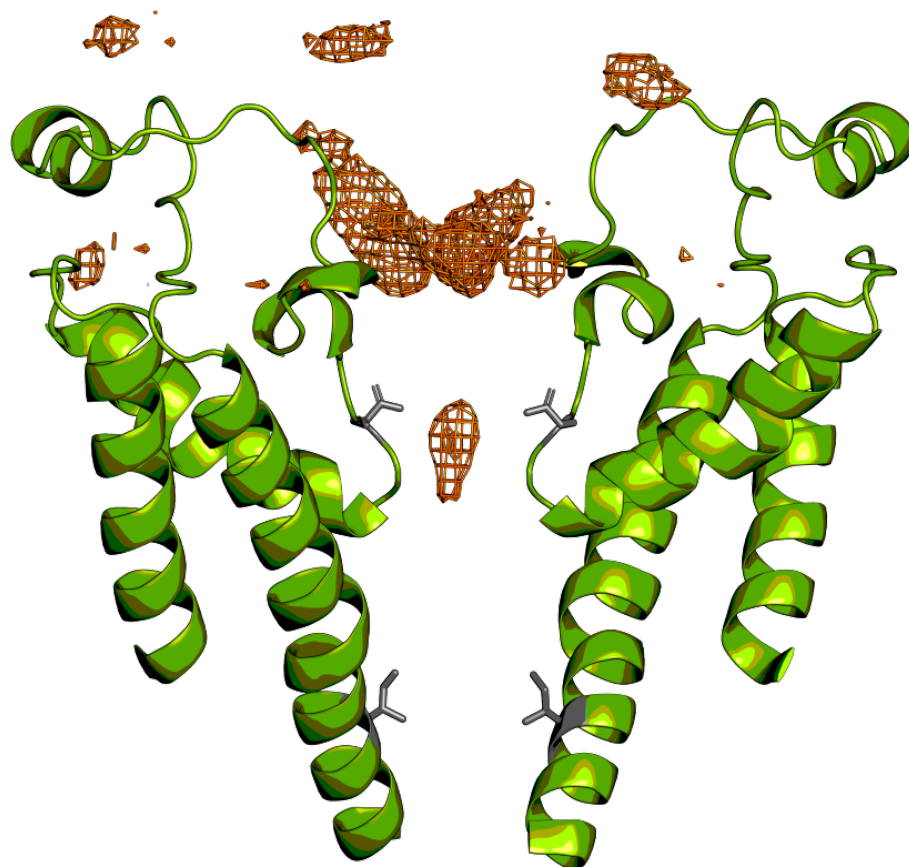

**Figure 3.** 3D density map of Ca<sup>2+</sup> cations around the EPV and SF of TRPM5. The density of Ca<sup>2+</sup> ions was calculated from concatenated trajectories of TRPM5 in a di-cationic solution under a transmembrane voltage of ~ -50 mV generated by the CompEL method. A major density maximum is seen within the EPV, where Ca<sup>2+</sup> associates. Occasionally, Ca<sup>2+</sup> ions migrated into the SF (minor density maximum at Q906); however, they were not able to traverse past the SF at bio-mimetic voltages. The sidechains of Q906 of the SF and I966 of the lower gate are shown as sticks in grey.

230 effect of supra-physiological membrane voltages. To further explore the ion permeation dynamics  
231 in TRPM5 and their underlying determinants, we thus aimed to enhance the sampling of both  
232 Na<sup>+</sup> and Ca<sup>2+</sup> permeation, while at the same time remain within the Na<sup>+</sup>-selective voltage regime.  
233 We selected an intermediate voltage of ~ -340 mV for investigating permeation in mono-cationic  
234 solutions to ensure a sufficient number of traversals of both Ca<sup>2+</sup> and Na<sup>+</sup> ions in the monovalent-  
235 selective regime.

### 236 **Mechanistic insights into ion permeation in TRPM5 from mono-cationic solutions**

237 We conducted *in silico* electrophysiology simulations with an applied electric field, generating a  
238 membrane voltage of ~ -340 mV, to investigate the permeation mechanism of Na<sup>+</sup>, K<sup>+</sup> and Ca<sup>2+</sup>  
239 ions in mono-cationic solutions at sufficient sampling efficiency (Table 3). As shown in Figure 4, we  
240 observed a clear difference between the behaviour of monovalent Na<sup>+</sup> and K<sup>+</sup> ions in the channel  
241 and the divalent Ca<sup>2+</sup> ions, especially near and in the central cavity.

**Table 2.** Calculated conductances and selectivities from CompEL simulations of ion permeation in the TRPM5 channel. Mean inward conductances and standard error of the mean (SEM) were calculated from overlapping 50 ns windows from three-fold replicated 500 ns simulations of an anti-parallel double bilayer system. The number of permeation events associated with the conductance for each cation is displayed in brackets below the respective conductance values. Mean selectivity ratios of Na<sup>+</sup> and Ca<sup>2+</sup> permeation events and SEM were calculated from three-fold replicated 500 ns simulations.

| Conc. gradient    | Voltage (mV) | Conductance (pS)  |                   |                 |          | P <sub>Na</sub> /P <sub>Ca</sub> |
|-------------------|--------------|-------------------|-------------------|-----------------|----------|----------------------------------|
|                   |              | Na <sup>+</sup>   | Ca <sup>2+</sup>  | Cl <sup>-</sup> | Overall  |                                  |
| 135 mM :<br>15 mM | -50          | 16 ± 3.1<br>(15)  | 0 ± 0.0<br>(0)    | 0 ± 0.0<br>(0)  | 16 ± 3.1 | ∞                                |
|                   | -130         | 7 ± 1.3<br>(18)   | 0 ± 0.0<br>(0)    | 0 ± 0.0<br>(0)  | 7 ± 1.3  | ∞                                |
|                   | -380         | 4 ± 0.5<br>(32)   | 5 ± 0.8<br>(19)   | 0 ± 0.1<br>(1)  | 9 ± 1.0  | 1.9 ± 0.41                       |
|                   | -610         | 10 ± 0.9<br>(115) | 29 ± 2.5<br>(168) | -1 ± 0.2<br>(6) | 38 ± 3.1 | 0.8 ± 0.13                       |

242 As can be seen, whereas Na<sup>+</sup> and K<sup>+</sup> ions occupied the central cavity of the channel for most  
 243 of the simulated time, permeating Ca<sup>2+</sup> ions traversed the inner cavity rapidly, not exhibiting any  
 244 apparent immobilisation within the cavity. Despite occupying the cavity for extended periods of  
 245 time, Na<sup>+</sup> and K<sup>+</sup> ions did not seem to bind to a particular binding position or residue within the  
 246 cavity, but instead explored nearly the entire cavity volume before they permeated through the  
 247 lower gate to the intracellular side. In this way, the cavity serves to store a monovalent ion rather  
 248 than providing specific binding sites for it. A similar behaviour has recently been described for  
 249 simulations of Na<sup>+</sup> ions in the cavity of the homo-dimeric, endo-lysosomal Na<sup>+</sup>-selective cation  
 250 channel TPC2 (Milenkovic et al., 2021).

251 Looking at the density of ions along the pore axis, and using the negative logarithmic density  
 252 as an estimate for the underlying free energy profile at the examined non-equilibrium permeation  
 253 conditions under a membrane voltage of -340 mV, it can be observed that the cavity region formed  
 254 only a shallow, broad energy minimum for the permeating monovalent cations, whereas in con-  
 255 trast, permeating Ca<sup>2+</sup> ions experienced a small apparent energy barrier in the same region (Fig-  
 256 ure 5). Both monovalent and divalent ions showed further binding to a relatively shallow binding  
 257 site at the EPV. In addition, all ion types experienced a slight energy barrier to translocation near  
 258 the intracellular channel exit (hydrophobic lower gate). Notably, the ions did not show major inter-  
 259 actions with the SF. This observation, again, is in accordance with observations made in simulations  
 260 of TPC2 (Milenkovic et al., 2021).

261 We conducted additional simulations using applied external electric fields of differing magni-  
 262 tudes. Similar to the low-voltage CompEL simulations, whereas the main features of the ion den-

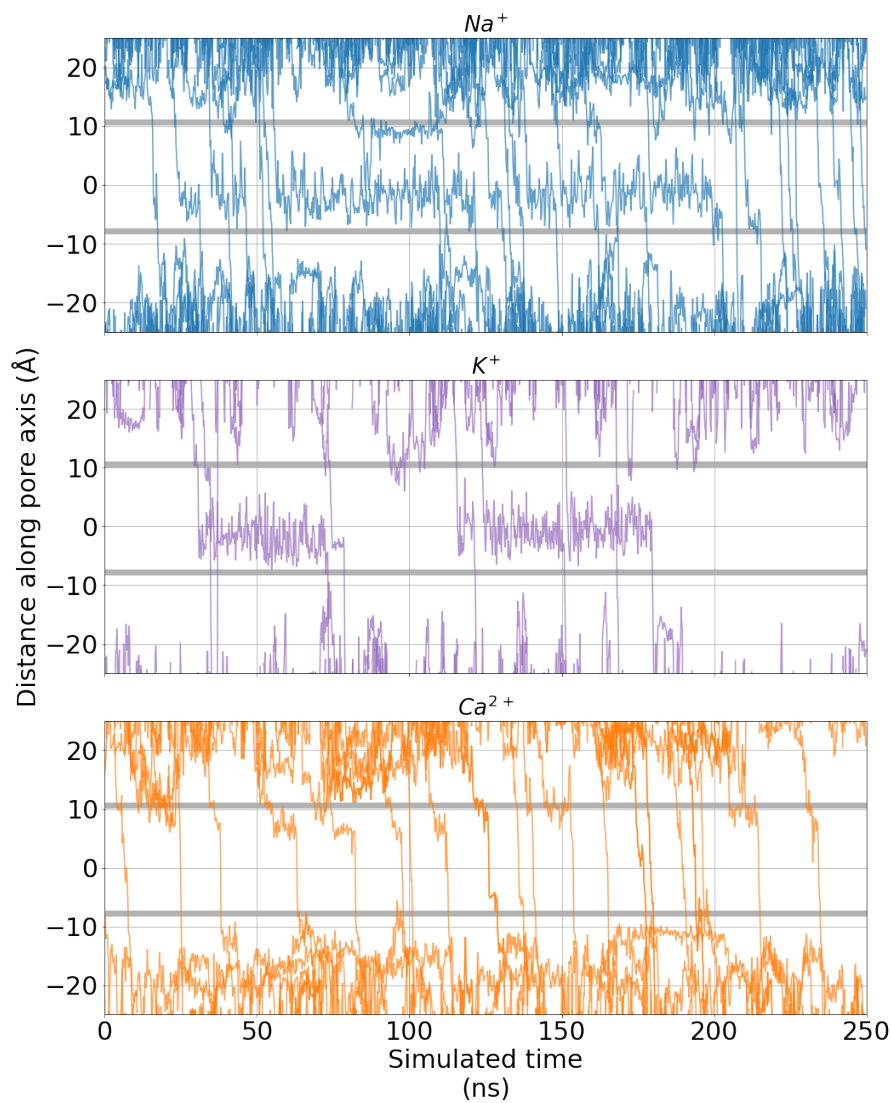

**Figure 4.** Exemplar permeation traces of the  $z$ -coordinate of permeating  $\text{Na}^+$  (blue, top),  $\text{K}^+$  (purple, middle), and  $\text{Ca}^{2+}$  (orange, bottom) over time, plotted from simulations performed in a mono-cationic solution with an applied electric field (-340 mV). The shaded grey regions represent the average position of the pore constrictions formed by Q906 in the SF (upper) and I966 of the hydrophobic gate (lower). Please note, only cations that fully permeate through the pore within the 250 ns simulations are shown in the plot.

263 site and free energy estimates occurred across all tested voltages,  $\text{Ca}^{2+}$  was increasingly excluded  
264 from the cavity at these lower voltages, and no longer able to enter into the cavity at the lowest  
265 voltage of -50 mV during the time span of our simulations (Figure S1). This again showed that the  
266 ion selectivity of TRPM5 was voltage-dependent in the simulations. We therefore next aimed to elu-  
267 cidate the molecular foundations of this behaviour and, importantly, the ion selectivity of TRPM5  
268 in general.

**Table 3.** Calculated conductances from applied field simulations of ion permeation in the TRPM5 channel. Mean inward conductances and standard error of the mean (SEM) were calculated from overlapping 50 ns windows from three-fold replicated 500 ns simulations of a single bilayer system. The number of permeation events observed for each cation is displayed in brackets below the respective conductance values.

| <b>Voltage (mV)</b> | <b>Ion solution</b>            | <b>Conductance (pS)</b> |
|---------------------|--------------------------------|-------------------------|
| <b>-50</b>          | <b>150 mM NaCl</b>             | $19 \pm 6.7$<br>(4)     |
|                     | <b>150 mM CaCl<sub>2</sub></b> | $0 \pm 0.0$<br>(0)      |
| <b>-200</b>         | <b>150 mM NaCl</b>             | $17 \pm 3.1$<br>(15)    |
|                     | <b>150 mM CaCl<sub>2</sub></b> | $9 \pm 3.8$<br>(4)      |
| <b>-340</b>         | <b>150 mM NaCl</b>             | $52 \pm 5.6$<br>(83)    |
|                     | <b>150 mM KCl</b>              | $21 \pm 4.2$<br>(34)    |
|                     | <b>150 mM CaCl<sub>2</sub></b> | $85 \pm 5.0$<br>(54)    |

### 269 **Solvation profiles of cations during channel permeation**

270 To probe if cation desolvation played a part in selective ion permeation, we calculated the num-  
271 ber of water oxygen atoms within a 3 Å radius around the ions, representing their first solvation  
272 shell (Figure 5). Amongst other mechanisms (*Ives et al., 2023; Zhang et al., 2023*), the desolvation  
273 of permeating ions has previously been reported to represent an important potential selectivity  
274 mechanism in ion channels (*Noskov and Roux, 2007; Kopec et al., 2018*). Differences in the des-  
275 solvation energies of permeating ions provide a thermodynamic penalty which can underpin the  
276 more favourable permeation of an ionic species over another. Here, the free energy required to  
277 desolvate Ca<sup>2+</sup> strongly exceeds that for Na<sup>+</sup> and K<sup>+</sup> (*Marcus, 1991*), such that this difference could  
278 give rise to monovalent-selectivity in TRPM5.

279 In the bulk solution of the simulated systems, Na<sup>+</sup>, K<sup>+</sup>, and Ca<sup>2+</sup> ions showed the expected water  
280 coordination number of their solvation shells. As both Na<sup>+</sup> and K<sup>+</sup> ions entered the pore of TRPM5,  
281 they became partially desolvated by Q906, with its side chain displacing 1–2 water molecules from  
282 the first solvation shell of the ions. After traversing the constriction at Q906, the monovalent ions  
283 were then resolvated in the pore cavity, before again being partially desolvated at the hydropho-

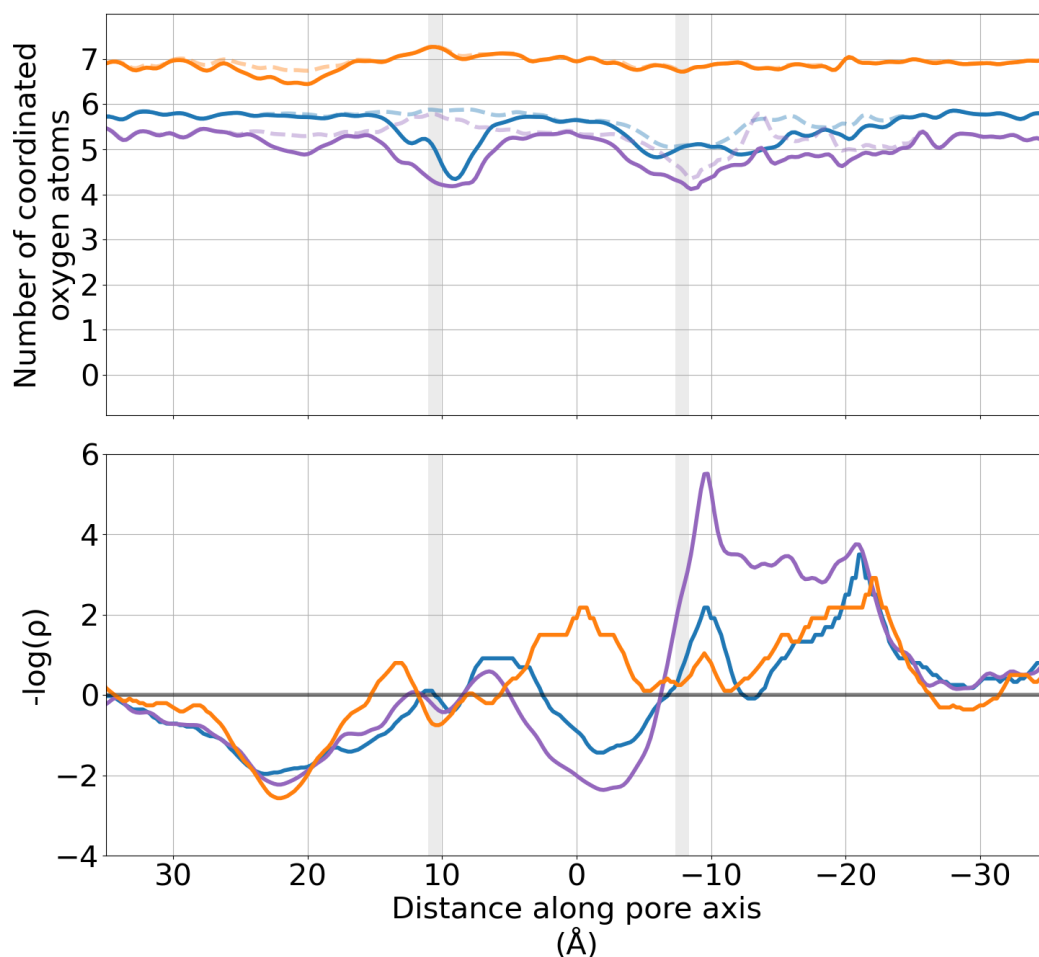

**Figure 5.** Solvation and log-density profiles of  $\text{Na}^+$  (blue),  $\text{K}^+$  (purple) and  $\text{Ca}^{2+}$  (orange) cations in the TRPM5 pore from simulations with a mono-cationic solution, and an applied transmembrane voltage of  $\sim -340$  mV. **(a)** The mean number of oxygen atoms of water molecules (solid line) and of protein oxygen atoms (dashed line) within  $3 \text{ \AA}$  of each permeating cation is shown. **(b)** Negative logarithmic density profiles of permeating cations as estimates of the non-equilibrium energy surface the ions experience in the pore (energy unit:  $k_B T$ ). Minima reflect binding sites, while maxima indicate barriers between the binding sites. The location of the pore constrictions formed by Q906 (upper) and I966 (lower) are shown as grey regions. The curves in both plots have been smoothed using a Gaussian filter with a sigma value of 2.

284 bic lower gate formed by I966. By contrast, the rapidly permeating  $\text{Ca}^{2+}$  ions did not show any  
285 significant desolvation when they crossed the SF, cavity, or hydrophobic lower gate of TRPM5.

286 The solvation profiles of permeating cations displayed an additional region of differing desol-  
287 vation within the EPV region, highlighted previously (Figure 2). In this region,  $\text{Ca}^{2+}$  and  $\text{K}^+$  ions  
288 were partially desolvated, indicating closer interactions with the acidic residues in the EPV region.  
289 By contrast,  $\text{Na}^+$  cations did not show any desolvation in this location. We observed similar sol-  
290 vation profiles for permeating cations in both our simulations using an external applied electric  
291 field in mono-cationic solutions (Figure S2) and in the CompEL simulations in di-cationic solutions

292 (Figure S3), across a range of voltage magnitudes.

293 Summarising, these findings suggest that ion desolvation in the SF or inner pore is not a major  
294 factor in achieving selectivity for monovalent cations. Since both monovalent and divalent cations  
295 occupied the EPV, filtering for monovalent ions must occur later in the permeation pathway. How-  
296 ever,  $\text{Ca}^{2+}$  ions were not desolvated when they traversed the inner cavity. As the energetic penalty  
297 for desolvating  $\text{Ca}^{2+}$  is far larger than for  $\text{Na}^+$  or  $\text{K}^+$  (*Marcus, 1991*), the observed desolvation pro-  
298 files therefore suggest that desolvation does not underpin the deselection of  $\text{Ca}^{2+}$  ions in TRPM5.

### 299 **Why does the central cavity form an attractive site for monovalent cations but a** 300 **repulsive site for divalent cations?**

301 The presence of a water-filled internal cavity is a conserved feature amongst cation-selective chan-  
302 nels. The cavity serves to maintain a high degree of ion hydration despite locating to the centre  
303 of the hydrophobic lipid bilayer, and to focus the membrane voltage difference onto the SF (*Doyle*  
304 *et al., 1998*). Like in other cation channels, we observed in TRPM5 that the major permeating  
305 species,  $\text{Na}^+$  and  $\text{K}^+$  ions, were re-hydrated and transiently captured in the cavity, following their  
306 permeation through the SF (*Milenkovic et al., 2021*). At higher voltages,  $\text{Ca}^{2+}$  ions were able to enter  
307 and traverse the cavity, but did not alter their hydration number during this process. This suggests  
308 that they did not interact favourably with any of the cavity-lining residues or the cavity overall. At  
309 lower voltages, by contrast,  $\text{Ca}^{2+}$  ions were completely excluded from entering the cavity.

310 We therefore investigated the difference between the pore and cavity properties of the highly  
311  $\text{Ca}^{2+}$ -selective TRP channel, TRPV5, and the monovalent-selective TRPM5. Contrary to TRPM5, the  
312 cavity of TRPV5 shows a high occupancy with  $\text{Ca}^{2+}$  ions (*Ives et al., 2023*). As displayed in Figure 6,  
313 the general features of the pore are preserved with a constriction at the extracellular SF, a wider  
314 internal cavity region, and a second constriction at the intracellular gate. TRPM5 has a markedly  
315 shorter SF, while its cavity is wider than that of TRPV5. However, there is a substantial difference  
316 in the pore lining of the two TRP channels. Whereas the TRPV5 SF is a strongly hydrophilic region,  
317 TRPM5 does not display increased hydrophilicity within its SF. The transition from the SF to the  
318 cavity is slightly hydrophobic in TRPM5, while this is a hydrophilic region in TRPV5. There are no  
319 differences between the hydrophobicity of the two channels at the intracellular gates.

320 The differing properties of the inner pore (cavity and SF) suggest that the absence of a favourable  
321 interaction of TRPM5 with  $\text{Ca}^{2+}$  in this region arises due to the raised hydrophobicity of its SF and  
322 upper portion of its inner cavity (hydrophobic funnel). In particular, the transition zone between  
323 the SF and the cavity in TRPM5 is lined by large hydrophobic residues at the bottom of the SF,  
324 especially F904 and I903. This sequence is shared with TRPM4, which is also a monovalent-cation  
325 selective channel (Fig. 7A). On pore-forming helix S6 of TRPM5, the additional hydrophobic residues  
326 V959 and L962 line the cavity towards the hydrophobic lower gate at I966, whereas only two polar  
327 side chains, N958 and N962, are involved. The conservation level of the large hydrophobic residues  
328 lining the cavity is generally high (dark and light pink surface colour in Fig. 7B).

329 The energetic cost of placing monovalent cations into a hydrophobic environment is smaller  
330 than that for divalent cations, even when they retain their hydration shells. The Born energy for  
331 divalent cations, for example, quantifying this electrostatic energy penalty in continuum models, is

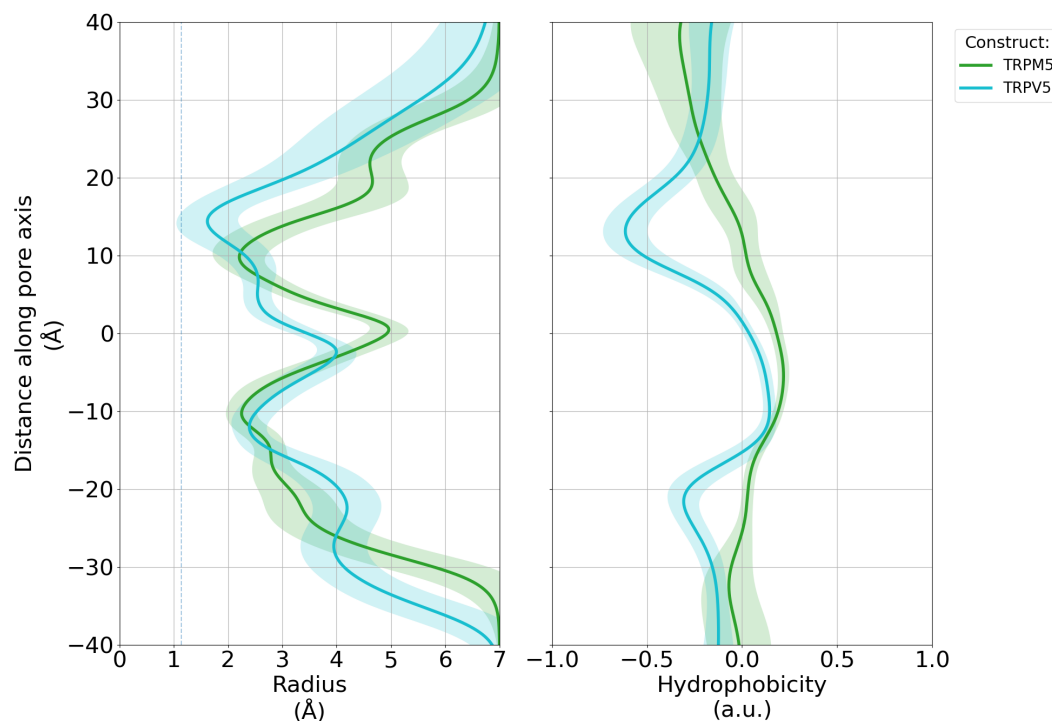

**Figure 6.** Pore architecture of the monovalent-selective TRPM5 channel (green) and the  $\text{Ca}^{2+}$ -selective TRPV5 channel (cyan) from MD simulations. The average pore radius (a) and hydrophobic profile (b) for each channel was calculated using CHAP (Rao et al., 2019). The standard deviation is shown as shaded regions. The profile of the TRPV5 was generated from simulation data previously published (Ives et al., 2023). The shaded grey regions represent the average position of the pore constrictions formed by Q906 in the SF (upper) and I966 of the hydrophobic gate (lower) in TRPM5.

332 four times larger than the penalty associated with monovalent cations (Born, 1920). As observed in  
333 the simulations under increased voltage, the protein matrix does not form favourable interactions  
334 with  $\text{Ca}^{2+}$  ions in its inner pore. The hydrophobicity of the TRPM5 pore gradually increases along  
335 the pore axis, with only few hydrophilic sites within the SF or central cavity.

336 Our results thus suggest that  $\text{Ca}^{2+}$  ions are unable to enter the increasingly hydrophobic envi-  
337 ronment of this region at physiological voltages, and only penetrate past the SF under high-voltage  
338 conditions, above the physiologically relevant level.

### 339 **Selectivity for monovalent cations is linked to permeation co-operativity between** 340 **two binding regions**

341 We hypothesised that, due to the presence of an additional binding or 'storage' region for mono-  
342 valent cations in the internal cavity compared to  $\text{Ca}^{2+}$ , the permeation mechanism for monovalent  
343 ions may be more efficient than for  $\text{Ca}^{2+}$ . In previous work, we developed a mutual-information  
344 based quantification method of the level of cooperativity when ions permeate across multiple ion  
345 channel binding sites, termed state-specific information (SSI; (Thomson et al., 2021; Vögele et al.,

|                  |   |   |   |   |   |   |   |   |   |   |              |
|------------------|---|---|---|---|---|---|---|---|---|---|--------------|
| TRPM5_HUMAN      | I | F | G | Q | I | L | T | V | I | D | TRPV5_HUMAN  |
| TRPM5_ZEBRAFISH  | I | F | G | Q | I | L | T | I | I | D | TRPV5_RABBIT |
| TRPM5_CHIMPANZEE | I | F | G | Q | I | L | T | I | I | D | TRPV5_RAT    |
| TRPM5_RAT        | I | F | G | Q | I | L | T | I | I | D | TRPV5_MOUSE  |
| TRPM5_MOUSE      | I | F | G | Q | I | L | T | I | I | D | TRPV6_HUMAN  |
| TRPM4_HUMAN      | I | F | G | Q | I | L | T | I | I | D | TRPV6_RAT    |
| TRPM4_GUINEA_PIG | I | F | G | Q | I | L | T | I | I | D | TRPV6_MOUSE  |
| TRPM4_RAT        | I | F | G | Q | I | L | T | I | I | D |              |
| TRPM4_MOUSE      | I | F | G | Q | I | L | T | I | I | D |              |

TRP – Na<sup>+</sup> selective

TRP – Ca<sup>2+</sup> selective

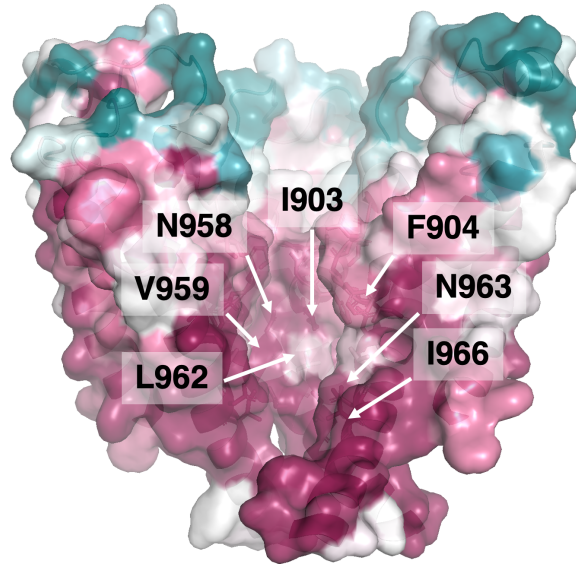

**Figure 7.** (Top) Sequence conservation of the SF and transition zone to the inner cavity in the monovalent-selective channels TRPM5 and TRPM4 compared to the Ca<sup>2+</sup>-selective channels TRPV5 and TRPV6. Colours according to Clustal Omega convention (Sievers *et al.*, 2011). (Bottom) Evolutionary conservation of the pore cavity in TRPM5 channels. Evolutionary conservation scores were calculated using ConSurf (Yariv *et al.*, 2023). The evolutionary conservation scores were projected onto the structure of TRPM5 from *D. rerio*, with one subunit removed for clarity. Figure made with Pymol (DeLano, 2002).

346 2022; Ives *et al.*, 2023)). In brief, SSI quantifies the probability that a state change of one binding  
 347 site, such as a change from binding an ion to becoming vacant upon ion permeation, is correlated  
 348 to a similar state change in a second binding site, in which case the unbinding events are coupled  
 349 to one another for instance by a knock-on mechanism.

350 We applied the SSI approach to ion conduction in TRPM5, focusing on the pair of ion binding  
 351 regions at the EPV and the channel cavity (see Figure 2). These two binding areas are shallow and  
 352 relatively distant to one another, but locate directly to the main pore axis. In addition, they show  
 353 moderate to high occupancy with monovalent cations, respectively (Figure 8).

354 By using SSI, we found that both Na<sup>+</sup> and K<sup>+</sup> ions displayed a high level of correlation between  
 355 binding and unbinding at the two successive sites, whereas the permeation of Ca<sup>2+</sup> ions showed  
 356 only a low degree of correlation slightly above the noise level (Figure 8). This suggests that a distant  
 357 knock-on mechanism is in operation between incoming monovalent ions, which, when unbinding  
 358 from the EPV bind transiently at the SF, as well as over substantial time spans within the cavity. In  
 359 other words, the cavity serves as a reservoir, more likely to release a Na<sup>+</sup> or K<sup>+</sup> ion to the cytoplasm  
 360 when a further monovalent cation approaches and inserts into the TRPM5 pore.



361 By contrast,  $\text{Ca}^{2+}$  ions permeated on their own. Their traversal is likely to be driven solely by the  
362 supra-physiological transmembrane electric field. Accordingly, lower-voltage simulations did not  
363 show any permeating  $\text{Ca}^{2+}$ . This selectivity for monovalent ions was abolished when the driving  
364 force for  $\text{Ca}^{2+}$  permeation exceeded a certain threshold. Permeation at higher voltages could thus  
365 be described as a '*pull-through*' of  $\text{Ca}^{2+}$  ions across the otherwise unfavourable environment of the  
366 inner cavity for divalent ions. This voltage-driven '*pull-through*' occurs due to the higher charge of  
367  $\text{Ca}^{2+}$ , doubling the Coulombic driving force compared to the monovalent ions, but is unlikely to be  
368 physiological.

369 Our results suggest that the occurrence of two binding regions for monovalent ions, one of  
370 which is a reservoir site in the central cavity, enhance permeation efficiency via a distant knock-on  
371 mechanism. By contrast,  $\text{Ca}^{2+}$  ions are prevented from entering the pore cavity at physiologically  
372 relevant membrane voltages by a hydrophobic gate region, abolishing the reservoir binding within  
373 and thus disrupting any sizeable permeation cooperativity.

### 374 **The transition zone from the selectivity filter to the central cavity is key for mono-** 375 **valent cation selectivity in TRPM5**

376 To test the hypothesis that the hydrophobicity of the transition zone connecting the SF to the  
377 central cavity provides the primary barrier to the permeation of divalent cations, we performed  
378 applied-field simulations of TRPM5 with a F904T mutation, which increases the hydrophilicity of  
379 this area, at two voltage magnitudes. In the  $\text{Ca}^{2+}$ -selective TRPV channels TRPV5 and TRPV6, a thre-  
380 onine residue is located at the structurally equivalent position. Since they also contain a charged  
381 glutamate in their selectivity filter, which shows a high affinity for  $\text{Ca}^{2+}$  but is absent in TRPM5, we  
382 did not expect the TRPM5 F904T mutant to show a similarly high degree of  $\text{Ca}^{2+}$ -selectivity. Rather,  
383 we hypothesised that the added hydrophilicity of the mutant may reduce the height of the hy-  
384 drophobic barrier for both monovalent and divalent cations, that is, increase the flow of  $\text{Na}^+$  while  
385 allowing the passage of  $\text{Ca}^{2+}$  in physiologically relevant voltage ranges.

386 Three-fold replicated simulations of the F904T mutant in 150 mM  $\text{CaCl}_2$  at -130 mV showed 13  
387 completed  $\text{Ca}^{2+}$  permeation events within a total time of 750 ns. In the same time span, 27  $\text{Na}^+$   
388 ions traversed the mutant channel in 150 mM NaCl solution (Table S3). The permeation numbers  
389 correspond to a selectivity of  $P_{\text{Na}}/P_{\text{Ca}}$  of  $\sim 2$ , otherwise not observed below a voltage of -380 mV.  
390 Additional control simulations at -200 mV in mono-cationic solution displayed 15  $\text{Na}^+$  and 4  $\text{Ca}^{2+}$   
391 permeation events in the WT (Table S2), whereas the mutant conducted 88  $\text{Na}^+$  ions and 28  $\text{Ca}^{2+}$   
392 ions within the same accumulated time span (Table S3).

393 These results show that the F904T mutation indeed facilitated the permeation of  $\text{Ca}^{2+}$ , while  
394 at the same time increasing the  $\text{Na}^+$  flux. We conclude that the hydrophobic transition zone be-  
395 tween the SF and the central cavity plays the major role in governing the selectivity of TRPM5 for  
396 monovalent cations at physiological voltages.

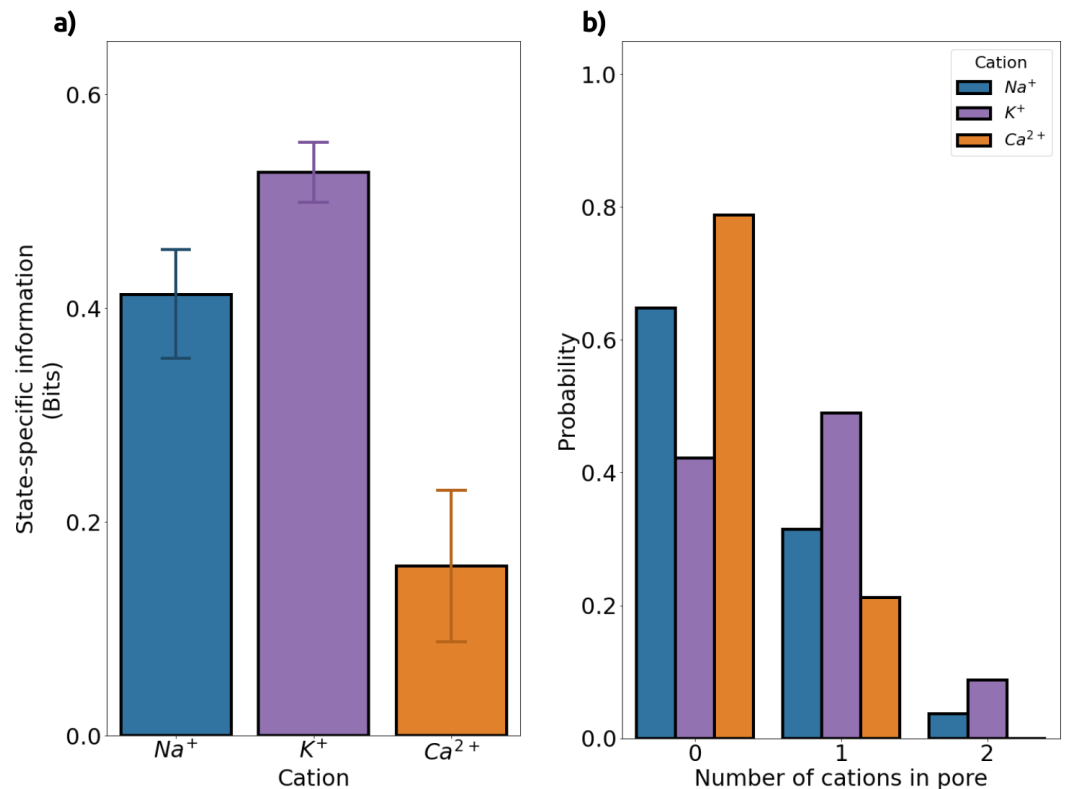

**Figure 8.** State-specific information (SSI) of cation transitions between binding sites and the average number of each cation within the pore of TRPM5. **(a)** Excess state-specific information (exSSI) between the EPV and pore cavity ion binding sites, quantifying the degree of co-operativity in the permeation mechanisms of Na<sup>+</sup> (blue), K<sup>+</sup> (purple), and Ca<sup>2+</sup> (orange) ions. The mean exSSI and SEM between transitions from the two binding sites were calculated from simulations performed in mono-cationic solutions with an externally applied voltage of ~ -340 mV. **(b)** Mean probability for the number of each cationic species within the inner TRPM5 pore, calculated from non-overlapping 50 ns windows from three-fold replicated 250 ns simulations. We defined the inner pore as the region between the constrictions formed by Q906 in the SF and I966 at the lower hydrophobic gate.

## 397 Discussion

398 The TRP channel superfamily encompasses a broad range of cation-selective ion channels of great  
399 physiological and biomedical importance (Ramsey *et al.*, 2006; Khalil *et al.*, 2018). While most  
400 members of the superfamily translocate both monovalent cations and divalent Ca<sup>2+</sup> at similar per-  
401 meabilities, TRPV5 and TRPV6 are strongly Ca<sup>2+</sup>-selective (Ives *et al.*, 2023) and TRPM4 and TRPM5  
402 are selective for monovalent cations (Owsianik *et al.*, 2006). In contrast to most other Na<sup>+</sup>-selective  
403 channels (Dudev and Lim, 2014), the SFs of TRPM4, TRPM5, and the endo-lysosomal TPC2 do not  
404 contain charged residues, while they retain a relatively high abundance of hydrophobic residues  
405 (Ruan *et al.*, 2021; Milenkovic *et al.*, 2021).

406 Ion selectivity is usually linked to the presence of specific binding sites in the channels' SF and in-  
407 ner pore (Hille, 2001; Zhou *et al.*, 2001), cooperativity between the permeation kinetics of multiple  
408 such binding sites (Hille, 2001; Köpfer *et al.*, 2014; Ives *et al.*, 2023; Derebe *et al.*, 2011), ion desol-

409 vation (*Noskov and Roux, 2007; Kopec et al., 2018*), or size exclusion effects (*Hille, 2001; Dudev and*  
410 *Lim, 2014*). Our simulations showed, however, that no high-affinity binding sites for cations exist  
411 within the pore of TRPM5, that only minor ion desolvation effects occur, and that size exclusion  
412 does not play a role in selectivity. The channel can conduct both monovalent and divalent cations  
413 at slightly increased membrane voltages. We observed two shallow, broad ion binding regions for  
414 monovalent cations in the TRPM5 channel; one within the EPV above the SF, and a second within  
415 the central cavity, whereas divalent cations did not interact favourably within the cavity.

416 Our findings suggest a new mechanism of monovalent cation selectivity, in which the combina-  
417 tion of an uncharged, relatively hydrophobic SF and the presence of large hydrophobic side chains  
418 at the entrance to the central channel cavity determine the monovalent-selectivity of TRPM5. Since  
419 the traversal of a divalent cation through this hydrophobic funnel incurs a larger energy penalty as  
420 compared to a monovalent cation, this hydrophobic region creates a higher energy barrier for the  
421 permeation of divalent cations (*Born, 1920*). The hydrophobic energy barrier difference generated  
422 in this way is of moderate magnitude, and therefore can be overcome by divalent cations in the  
423 supra-physiological voltage range.

424 Under physiologically relevant voltages, this barrier and the generally largely hydrophobic char-  
425 acter of the central cavity prevent divalent cations from entering and residing within the central cav-  
426 ity, whereas monovalent cations readily enter and occupy the cavity for substantial time spans. Nu-  
427 merous closed-state structures of TRPM4, a close monovalent-selective homolog of TRPM5, have  
428 been published within the PDB. Several of these structures include Na<sup>+</sup> cations modelled within  
429 the pore cavity (*Guo et al., 2017; Duan et al., 2018*). Consequently, these structures (PDB IDs [6BCJ](#),  
430 [6BCL](#), and [6BWI](#)) suggest that the presence of a monovalent cation binding region in the inner  
431 cavity is a conserved feature amongst the monovalent-selective TRPM4 and TRPM5 channels.

432 Due to this additional binding region, a distant knock-on mechanism is established between  
433 an incoming monovalent cation and the monovalent cation stored within the cavity, which greatly  
434 increases permeation efficiency. By contrast, under supra-physiological voltage conditions, diva-  
435 lent cations are simply 'pulled through' the hydrophobic cavity on their own, exhibiting no inter-  
436 actions with the cavity matrix or other cations. Our application of the mutual-information based  
437 SSI method (*Ives et al., 2023; Vögele et al., 2021*) to ions permeating through TRPM5 showed only  
438 negligible cooperativity for Ca<sup>2+</sup> permeation.

439 Finally, we examined whether a hydrophilic mutation at the entrance to the central cavity facil-  
440 itated the flux of divalent cations through this region. According to the findings discussed above,  
441 this was indeed the case in the F904T mutant of TRPM5, with substantial Ca<sup>2+</sup> permeation in a volt-  
442 age range that did not allow for Ca<sup>2+</sup> permeation in the WT channel. In line with a hydrophobic  
443 barrier that exists for both monovalent and divalent cations, but is larger for divalent cations, the  
444 flow of Na<sup>+</sup> also increased in the mutant, raising its overall conductance level.

## 445 **Acknowledgments**

446 We thank the University of Dundee I.T. services for maintenance of the School of Life Sciences  
447 high-performance computing (HPC) cluster which was utilised in this research.

## 448 **Author contributions**

449 CMI and UZ conceived the idea and designed the computational study, CMI conducted and anal-  
450 ysed the WT simulation data, ATŞ conducted and analysed the F904T mutant simulations, NJT anal-  
451 ysed the SSI data, UZ supervised the work, CMI and UZ wrote the manuscript with contributions  
452 from NJT, and all authors edited and reviewed the manuscript.

## 453 **References**

- 454 **Abraham MJ**, Murtola T, Schulz R, Páll S, Smith JC, Hess B, Lindahl E. GROMACS: High performance molecular  
455 simulations through multi-level parallelism from laptops to supercomputers. *SoftwareX*. 2015; 1-2:19–25.  
456 doi: [10.1016/j.softx.2015.06.001](https://doi.org/10.1016/j.softx.2015.06.001).
- 457 **Aksimentiev A**, Schulten K. Imaging  $\alpha$ -Hemolysin with Molecular Dynamics: Ionic Conductance, Os-  
458 motic Permeability, and the Electrostatic Potential Map. *Biophysical Journal*. 2005; 88:3745–3761. doi:  
459 <https://doi.org/10.1529/biophysj.104.058727>.
- 460 **Antonides LH**, Hurst QW, Ives CM, Ramberg K, Ostrovitsa N, Scanlan E, Caffrey M, Pitt SJ, Zachariae U. The  
461 SARS-CoV-2 envelope (E) protein forms a calcium- and voltage-activated calcium channel. *bioRxiv*. 2022; doi:  
462 [10.1101/2022.10.11.511775](https://doi.org/10.1101/2022.10.11.511775).
- 463 **Bauer P**, Hess B, Lindahl E, GROMACS 2022 Source code; 2022. doi: [10.5281/zenodo.6103835](https://doi.org/10.5281/zenodo.6103835).
- 464 **Born M**. Volumen und hydrationswärme der ionen. *Zeitschrift für physik*. 1920; 1(1):45–48.
- 465 **Brixel LR**, Monteilh-Zoller MK, Ingenbrandt CS, Fleig A, Penner R, Enklaar T, Zabel BU, Prawitt D. TRPM5 regu-  
466 lates glucose-stimulated insulin secretion. *Pflügers Archive - European Journal of Physiology*. 2010; 460:69–  
467 76.
- 468 **Colsoul B**, Schraenen A, Lemaire K, Quintens R, Van Lommel L, Segal A, Owsianik G, Talavera K, Voets T, Mar-  
469 golskee RF, et al. Loss of high-frequency glucose-induced  $\text{Ca}^{2+}$  oscillations in pancreatic islets correlates  
470 with impaired glucose tolerance in *Trpm5*<sup>-/-</sup> mice. *Proceedings of the National Academy of Sciences*. 2010;  
471 107:5208–5213.
- 472 **Darden T**, York D, Pedersen L. Particle mesh Ewald: An N-log(N) method for Ewald sums in large systems. *The*  
473 *Journal of Chemical Physics*. 1993; 98:10089–10092. doi: [10.1063/1.464397](https://doi.org/10.1063/1.464397).
- 474 **DeLano WL**. Pymol: An open-source molecular graphics tool. *CCP4 Newsletter on protein crystallography*.  
475 2002; 40:82–92. [http://www.ccp4.ac.uk/newsletters/newsletter40/11\\_pymol.pdf](http://www.ccp4.ac.uk/newsletters/newsletter40/11_pymol.pdf).
- 476 **Derebe MG**, Sauer DB, Zeng W, Alam A, Shi N, Jiang Y. Tuning the ion selectivity of tetrameric cation chan-  
477 nels by changing the number of ion binding sites. *Proceedings of the National Academy of Sciences*. 2011;  
478 108(2):598–602.
- 479 **Doyle DA**, Cabral JM, Pfuetzner RA, Kuo A, Gulbis JM, Cohen SL, Chait BT, MacKinnon R. The structure of the  
480 potassium channel: molecular basis of  $\text{K}^{+}$  conduction and selectivity. *science*. 1998; 280(5360):69–77.
- 481 **Duan J**, Li Z, Li J, Santa-Cruz A, Sanchez-Martinez S, Zhang J, Clapham DE. Structure of full-length human TRPM4.  
482 *Proceedings of the National Academy of Sciences*. 2018; 115:2377–2382.
- 483 **Dudev T**, Lim C. Ion selectivity strategies of sodium channel selectivity filters. *Accounts of chemical research*.  
484 2014; 47(12):3580–3587.
- 485 **Evans DJ**, Holian BL. The Nose-Hoover thermostat. *The Journal of Chemical Physics*. 1985; 83:4069–4074. doi:  
486 [10.1063/1.449071](https://doi.org/10.1063/1.449071).

- 487 **van Goor MK**, de Jager L, Cheng Y, van der Wijst J. High-resolution structures of transient receptor potential  
488 vanilloid channels: Unveiling a functionally diverse group of ion channels. *Protein Science*. 2020; 29:1569–  
489 1580.
- 490 **Gowers R**, Linke M, Barnoud J, Reddy T, Melo M, Seyler S, Domański J, Dotson D, Buchoux S, Kenney I, Beckstein  
491 O. MDAnalysis: A Python Package for the Rapid Analysis of Molecular Dynamics Simulations. In: *Proceedings*  
492 *of the 15th Python in Science Conference*; 2016. p. 98–105. doi: 10.25080/majora-629e541a-00e.
- 493 **Guo J**, She J, Zeng W, Chen Q, Bai Xc, Jiang Y. Structures of the calcium-activated, non-selective cation channel  
494 TRPM4. *Nature*. 2017; 552:205–209.
- 495 **Hess B**, Bekker H, Berendsen HJC, Fraaije JGEM. LINCS: A Linear Constraint Solver for molecular  
496 simulations. *Journal of Computational Chemistry*. 1997; 18:1463–1472. doi: 10.1002/(sici)1096-  
497 987x(199709)18:12<1463::aid-jcc4>3.0.co;2-h.
- 498 **Hille B**. Ion channels of excitable membranes. 3rd. ed. Sunderland, MA ;: 2001.
- 499 **Hilton JK**, Kim M, Van Horn WD. Structural and Evolutionary Insights Point to Allosteric Regula-  
500 tion of TRP Ion Channels. *Accounts of Chemical Research*. 2019; p. acs.accounts.9b00075. doi:  
501 10.1021/acs.accounts.9b00075.
- 502 **Hofmann T**, Chubanov V, Gudermann T, Montell C. TRPM5 is a voltage-modulated and Ca<sup>2+</sup>-activated mono-  
503 valent selective cation channel. *Current Biology*. 2003; 13:1153–1158.
- 504 **Huang J**, Rauscher S, Nawrocki G, Ran T, Feig M, De Groot BL, Grubmüller H, MacKerell AD. CHARMM36m: An  
505 improved force field for folded and intrinsically disordered proteins. *Nature Methods*. 2016; 14:71–73. doi:  
506 10.1038/nmeth.4067.
- 507 **Hunter JD**. Matplotlib: A 2D graphics environment. *Computing in Science and Engineering*. 2007; 9:99–104.  
508 doi: 10.1109/mcse.2007.55.
- 509 **Ives CM**, Thomson NJ, Zachariae U. A co-operative knock-on mechanism underpins Ca<sup>2+</sup>-selective cation per-  
510 meation in TRPV channels. *The Journal of General Physiology*. 2023; 155(5). doi: 10.1085/jgp.202213226.
- 511 **Jo S**, Cheng X, Islam SM, Huang L, Rui H, Zhu A, Lee HS, Qi Y, Han W, Vanommeslaeghe K, MacKerell AD,  
512 Roux B, Im W. CHARMM-GUI PDB manipulator for advanced modeling and simulations of proteins con-  
513 taining nonstandard residues. *Advances in Protein Chemistry and Structural Biology*. 2014; 96:235–265. doi:  
514 10.1016/bs.apcsb.2014.06.002.
- 515 **Jo S**, Kim T, Im W. Automated builder and database of protein/membrane complexes for molecular dynamics  
516 simulations. *PLoS ONE*. 2007; 2. doi: 10.1371/journal.pone.0000880.
- 517 **Jo S**, Kim T, Iyer VG, Im W. CHARMM-GUI: A web-based graphical user interface for CHARMM. *Journal of Com-*  
518 *putational Chemistry*. 2008; 29:1859–1865. doi: 10.1002/jcc.20945.
- 519 **Jorgensen WL**, Chandrasekhar J, Madura JD, Impey RW, Klein ML. Comparison of simple potential functions  
520 for simulating liquid water. *The Journal of Chemical Physics*. 1983; 79:926–935. doi: 10.1063/1.445869.
- 521 **Khalil M**, Alliger K, Weidinger C, Yerinde C, Wirtz S, Becker C, Engel MA. Functional role of transient receptor  
522 potential channels in immune cells and epithelia. *Frontiers in Immunology*. 2018; 9:174.
- 523 **Koivisto AP**, Belvisi MG, Gaudet R, Szallasi A. Advances in TRP channel drug discovery: From target validation  
524 to clinical studies. *Nature Reviews Drug Discovery*. 2022; 21:41–59.
- 525 **Kopeck W**, Köpfer DA, Vickery ON, Bondarenko AS, Jansen TLC, de Groot BL, Zachariae U. Direct knock-on  
526 of desolvated ions governs strict ion selectivity in K<sup>+</sup> channels. *Nature Chemistry*. 2018; 10:813–820. doi:  
527 10.1038/s41557-018-0105-9.

- 528 **Köpfer DA**, Song C, Gruene T, Sheldrick GM, Zachariae U, De Groot BL. Ion permeation in K<sup>+</sup> channels occurs  
529 by direct Coulomb knock-on. *Science*. 2014; 346:352–355. doi: [10.1126/science.1254840](https://doi.org/10.1126/science.1254840).
- 530 **Kutzner C**, Grubmüller H, de Groot B, Zachariae U. Computational Electrophysiology: The Molecular Dynamics  
531 of Ion Channel Permeation and Selectivity in Atomistic Detail. *Biophysical Journal*. 2011; 101:809–817. doi:  
532 <https://doi.org/10.1016/j.bpj.2011.06.010>.
- 533 **Kutzner C**, Köpfer DA, Machtens JP, de Groot BL, Song C, Zachariae U. Insights into the function of ion channels  
534 by computational electrophysiology simulations. *Biochimica et Biophysica Acta (BBA) - Biomembranes*. 2016;  
535 1858:1741–1752. doi: <https://doi.org/10.1016/j.bbamem.2016.02.006>.
- 536 **Lee J**, Cheng X, Swails JM, Yeom MS, Eastman PK, Lemkul JA, Wei S, Buckner J, Jeong JC, Qi Y, Jo S, Pande VS,  
537 Case DA, Brooks CL, MacKerell AD, Klauda JB, Im W. CHARMM-GUI Input Generator for NAMD, GROMACS,  
538 AMBER, OpenMM, and CHARMM/OpenMM Simulations Using the CHARMM36 Additive Force Field. *Journal*  
539 *of Chemical Theory and Computation*. 2016; 12:405–413. doi: [10.1021/acs.jctc.5b00935](https://doi.org/10.1021/acs.jctc.5b00935).
- 540 **Lindahl**, Abraham, Hess, van der Spoel, GROMACS 2020.2 Source code; 2020. doi: [10.5281/zenodo.3773801](https://doi.org/10.5281/zenodo.3773801).
- 541 **Liu C**, Song C. Calcium binding and permeation in TRPV channels: insights from molecular dynamics simula-  
542 tions. *bioRxiv*. 2022; doi: [10.1101/2022.09.07.506889](https://doi.org/10.1101/2022.09.07.506889).
- 543 **Liu C**, Zhang A, Yan N, Song C. Atomistic details of charge/space competition in the Ca<sup>2+</sup>selectivity of ryanodine  
544 receptors. *Journal of Physical Chemistry Letters*. 2021 may; 12:4286–4291. doi: [10.1021/acs.jpcllett.1c00681](https://doi.org/10.1021/acs.jpcllett.1c00681).
- 545 **Lomize MA**, Pogozheva ID, Joo H, Mosberg HI, Lomize AL. OPM database and PPM web server: Resources for  
546 positioning of proteins in membranes. *Nucleic Acids Research*. 2012; 40:370–376. doi: [10.1093/nar/gkr703](https://doi.org/10.1093/nar/gkr703).
- 547 **Marcus Y**. Thermodynamics of solvation of ions. Part 5.—Gibbs free energy of hydration at 298.15 K. *Journal*  
548 *of the Chemical Society, Faraday Transactions*. 1991; 87:2995–2999.
- 549 **McClendon CL**, Friedland G, Mobley DL, Amirkhani H, Jacobson MP. Quantifying correlations between allosteric  
550 sites in thermodynamic ensembles. *Journal of Chemical Theory and Computation*. 2009 sep; 5:2486–2502.  
551 doi: [10.1021/ct9001812](https://doi.org/10.1021/ct9001812).
- 552 **Michaud-Agrawal N**, Denning EJ, Woolf TB, Beckstein O. MDAAnalysis: A toolkit for the analysis of molecular  
553 dynamics simulations. *Journal of Computational Chemistry*. 2011; 32:2319–2327. doi: [10.1002/jcc.21787](https://doi.org/10.1002/jcc.21787).
- 554 **Milenkovic S**, Bodrenko IV, Carpaneto A, Ceccarelli M. The key role of the central cavity in sodium transport  
555 through ligand-gated two-pore channels. *Physical Chemistry Chemical Physics*. 2021; 23(34):18461–18474.
- 556 **Millman KJ**, Aivazis M, Python for scientists and engineers; 2011. doi: [10.1109/mcse.2011.36](https://doi.org/10.1109/mcse.2011.36).
- 557 **Moran MM**. TRP Channels as Potential Drug Targets. *Annual Review of Pharmacology and Toxicology*. 2018  
558 jan; 58:309–330. doi: [10.1146/annurev-pharmtox-010617-052832](https://doi.org/10.1146/annurev-pharmtox-010617-052832).
- 559 **Nilius B**. TRP channels in disease. *Biochimica et Biophysica Acta (BBA) - Molecular Basis of Disease*. 2007;  
560 1772:805–812.
- 561 **Nilius B**, Owsianik G. The transient receptor potential family of ion channels. *Genome Biology*. 2011; 12:1–11.
- 562 **Noskov SY**, Roux B. Importance of hydration and dynamics on the selectivity of the KcsA and NaK channels.  
563 *The Journal of General Physiology*. 2007; 129(2):135–143.
- 564 **Oliphant TE**. Python for scientific computing. *Computing in Science and Engineering*. 2007; 9:10–20. doi:  
565 [10.1109/mcse.2007.58](https://doi.org/10.1109/mcse.2007.58).

- 566 **Owsianik G**, Talavera K, Voets T, Nilius B. Permeation And Selectivity Of TRP Channels. *Annual Review of*  
567 *Physiology*. 2006; 68:685–717. doi: [10.1146/annurev.physiol.68.040204.101406](https://doi.org/10.1146/annurev.physiol.68.040204.101406).
- 568 **Parrinello M**, Rahman A. Polymorphic transitions in single crystals: A new molecular dynamics method. *Journal*  
569 *of Applied Physics*. 1981; 52:7182–7190. doi: [10.1063/1.328693](https://doi.org/10.1063/1.328693).
- 570 **Pérez CA**, Huang L, Rong M, Kozak JA, Preuss AK, Zhang H, Max M, Margolskee RF. A transient receptor potential  
571 channel expressed in taste receptor cells. *Nature Neuroscience*. 2002; 5:1169–1176.
- 572 **Pérez F**, Granger BE. IPython: A system for interactive scientific computing. *Computing in Science and Engi-*  
573 *neering*. 2007; 9:21–29. doi: [10.1109/mcse.2007.53](https://doi.org/10.1109/mcse.2007.53).
- 574 **Pethel SD**, Hahs DW. Exact Test of Independence Using Mutual Information. *Entropy*. 2014; 16:2839–2849. doi:  
575 [10.3390/e16052839](https://doi.org/10.3390/e16052839).
- 576 **Prawitt D**, Monteilh-Zoller MK, Brixel L, Spangenberg C, Zabel B, Fleig A, Penner R. TRPM5 is a transient Ca<sup>2+</sup>-  
577 activated cation channel responding to rapid changes in [Ca<sup>2+</sup>] i. *Proceedings of the National Academy of*  
578 *Sciences*. 2003; 100:15166–15171.
- 579 **Ramsey IS**, Delling M, Clapham DE. An introduction to TRP channels. *Annual Review of Physiology*. 2006;  
580 68:619–666. doi: [10.1146/annurev.physiol.68.040204.100431](https://doi.org/10.1146/annurev.physiol.68.040204.100431).
- 581 **Rao S**, Sansom MSPP, Tucker SJ, Klesse G, Rao S, Sansom MSPP, Tucker SJ, Klesse G. CHAP: A Versatile Tool  
582 for the Structural and Functional Annotation of Ion Channel Pores. *Journal of Molecular Biology*. 2019 aug;  
583 431:3353–3365. doi: [10.1016/j.jmb.2019.06.003](https://doi.org/10.1016/j.jmb.2019.06.003).
- 584 **Roux B**. Ion channels and ion selectivity. *Essays in Biochemistry*. 2017; 61:201–209.
- 585 **Ruan Z**, Haley E, Orozco JJ, Sabat M, Myers R, Roth R, Du J, Lü W. Structures of the TRPM5 channel elucidate  
586 mechanisms of activation and inhibition. *Nature Structural and Molecular Biology*. 2021 jul; 28:604–613. doi:  
587 [10.1038/s41594-021-00607-4](https://doi.org/10.1038/s41594-021-00607-4).
- 588 **Samanta A**, Hughes TE, Moiseenkova-Bell VY. Transient receptor potential (TRP) channels. *Membrane Protein*  
589 *Complexes: Structure and Function*. 2018; p. 141–165.
- 590 **Schackert FK**, Biedermann J, Abdolvand S, Minniberger S, Song C, Plested AJR, Carloni P, Sun H. Mechanism  
591 of calcium permeation in a glutamate receptor ion channel. *ChemRxiv*. 2022; doi: [10.26434/chemrxiv-2022-](https://doi.org/10.26434/chemrxiv-2022-x73hl-v2)  
592 [x73hl-v2](https://doi.org/10.26434/chemrxiv-2022-x73hl-v2).
- 593 **Sievers F**, Wilm A, Dineen D, Gibson TJ, Karplus K, Li W, Lopez R, McWilliam H, Remmert M, Söding J, et al. Fast,  
594 scalable generation of high-quality protein multiple sequence alignments using Clustal Omega. *Molecular*  
595 *systems biology*. 2011; 7(1):539.
- 596 **Thomson NJ**, Vickery ON, Ives CM, Zachariae U. Ion-water coupling controls class A GPCR signal transduction  
597 pathways. *bioRxiv*. 2021; doi: [10.1101/2020.08.28.271510](https://doi.org/10.1101/2020.08.28.271510).
- 598 **Ullrich ND**, Voets T, Prenen J, Vennekens R, Talavera K, Droogmans G, Nilius B. Comparison of functional  
599 properties of the Ca<sup>2+</sup>-activated cation channels TRPM4 and TRPM5 from mice. *Cell Calcium*. 2005; 37:267–  
600 278.
- 601 **Van Der Walt S**, Colbert SC, Varoquaux G. The NumPy array: A structure for efficient numerical computation.  
602 *Computing in Science and Engineering*. 2011; 13:22–30. doi: [10.1109/mcse.2011.37](https://doi.org/10.1109/mcse.2011.37).
- 603 **Vennekens R**, Mesuere M, Philippaert K. TRPM5 in the battle against diabetes and obesity. *Acta Physiologica*.  
604 2018; 222:e12949.

- 605 **Vögele M**, Thomson NJ, Truong ST, McAvity J, Zachariae U, Dror RO. Systematic Analysis of Biomolecular Con-  
606 formational Ensembles with PENZA. arXiv. 2022; .
- 607 **Vögele M**, Thomson NJ, Truong ST, McAvity J, drorlab/pensa: PENZA 0.2.7; 2021. doi: [10.5281/zenodo.5522808](https://doi.org/10.5281/zenodo.5522808).
- 608 **Waskom M**, Botvinnik O, O’Kane D, Hobson P, Ostblom J, Lukauskas S, Gemperline DC, Augspurger T,  
609 Halchenko Y, Cole JB, Warmenhoven J, de Ruiter J, Pye C, Hoyer S, Vanderplas J, Villalba S, Kunter G, Quintero  
610 E, Bachant P, Martin M, et al., mwaskom/seaborn: v0.9.0 (July 2018); 2018. doi: [10.5281/zenodo.1313201](https://doi.org/10.5281/zenodo.1313201).
- 611 **Wu EL**, Cheng X, Jo S, Rui H, Song KC, Dávila-Contreras EM, Qi Y, Lee J, Monje-Galvan V, Venable RM, Klauda  
612 JB, Im W. CHARMM-GUI membrane builder toward realistic biological membrane simulations. Journal of  
613 Computational Chemistry. 2014; 35:1997–2004. doi: [10.1002/jcc.23702](https://doi.org/10.1002/jcc.23702).
- 614 **Yariv B**, Yariv E, Kessel A, Masrati G, Chorin AB, Martz E, Mayrose I, Pupko T, Ben-Tal N. Using evolutionary  
615 data to make sense of macromolecules with a “face-lifted” ConSurf. Protein Science. 2023; 32(3):e4582. doi:  
616 <https://doi.org/10.1002/pro.4582>.
- 617 **Zhang A**, Yu H, Liu C, Song C. The Ca<sup>2+</sup> permeation mechanism of the ryanodine receptor revealed by a multi-  
618 site ion model. Nature Communications. 2020; 11:922. doi: [10.1038/s41467-020-14573-w](https://doi.org/10.1038/s41467-020-14573-w).
- 619 **Zhang J**, Song D, Schackert FK, Li J, Xiang S, Tian C, Gong W, Carloni P, Alfonso-Prieto M, Shi C. Fluoride per-  
620 meation mechanism of the Fluc channel in liposomes revealed by solid-state NMR. Science Advances. 2023;  
621 9(34):eadg9709.
- 622 **Zhang Y**, Hoon MA, Chandrashekar J, Mueller KL, Cook B, Wu D, Zuker CS, Ryba NJ. Coding of sweet, bitter, and  
623 umami tastes: different receptor cells sharing similar signaling pathways. Cell. 2003; 112:293–301.
- 624 **Zhou Y**, Morais-Cabral JH, Kaufman A, MacKinnon R. Chemistry of ion coordination and hydration revealed by  
625 a K<sup>+</sup> channel–Fab complex at 2.0 Å resolution. Nature. 2001; 414(6859):43–48.



626 **Supplementary**

627 Summary of MD simulations used within this study

**Table S1.** Summary of CompEL simulation details of the TRPM5 channel. All simulations were conducted in a di-cationic solution of 75 mM NaCl and 75 mM CaCl<sub>2</sub>. In all simulations, the Ca<sup>2+</sup> cations occupying the Ca<sub>TMD</sub> were modelled, and remained bound for the duration of the simulations.

|                                                                          |                                                                                                                                                  |                                                                                    |                                                                                    |                                                                                    |
|--------------------------------------------------------------------------|--------------------------------------------------------------------------------------------------------------------------------------------------|------------------------------------------------------------------------------------|------------------------------------------------------------------------------------|------------------------------------------------------------------------------------|
| <b>Protein</b>                                                           | TRPM5                                                                                                                                            |                                                                                    |                                                                                    |                                                                                    |
| <b>Structure</b>                                                         | 7MBS<br>(698-1020)                                                                                                                               |                                                                                    |                                                                                    |                                                                                    |
| <b>Force field</b>                                                       | CHARMM36m                                                                                                                                        |                                                                                    |                                                                                    |                                                                                    |
| <b>Water</b>                                                             | TIP3P                                                                                                                                            |                                                                                    |                                                                                    |                                                                                    |
| <b><i>In silico electrophysiology methodology</i></b>                    | CompEL<br>(anti-parallel with a 9:1 concentration gradient)                                                                                      |                                                                                    |                                                                                    |                                                                                    |
| <b>Ion</b>                                                               | 75 mM NaCl + 75mM CaCl <sub>2</sub><br>266 Na <sup>+</sup> (CHARMM36m)<br>274 Ca <sup>2+</sup> (Zhang et al.)<br>814 Cl <sup>-</sup> (CHARMM36m) |                                                                                    |                                                                                    |                                                                                    |
| <b>Independent simulations</b>                                           | 3                                                                                                                                                | 3                                                                                  | 3                                                                                  | 3                                                                                  |
| <b>Total simulation time (μs)</b>                                        | 1.5                                                                                                                                              | 1.5                                                                                | 1.5                                                                                | 1.5                                                                                |
| <b>Total aggregated simulation time (μs)</b>                             | 3                                                                                                                                                | 3                                                                                  | 3                                                                                  | 3                                                                                  |
| <b>Ionic ratios between compartments (Extracellular : Intracellular)</b> | 239 : 27 Na <sup>+</sup><br>239 : 35 Ca <sup>2+</sup><br>681 : 133 Cl <sup>-</sup>                                                               | 239 : 27 Na <sup>+</sup><br>239 : 35 Ca <sup>2+</sup><br>680 : 134 Cl <sup>-</sup> | 239 : 27 Na <sup>+</sup><br>239 : 35 Ca <sup>2+</sup><br>677 : 137 Cl <sup>-</sup> | 239 : 27 Na <sup>+</sup><br>239 : 35 Ca <sup>2+</sup><br>673 : 141 Cl <sup>-</sup> |
| <b>Estimated voltage (mV)</b>                                            | -50                                                                                                                                              | -130                                                                               | -380                                                                               | -610                                                                               |
| <b>Permeation events</b>                                                 | 15 Na <sup>+</sup><br>0 Ca <sup>2+</sup><br>0 Cl <sup>-</sup>                                                                                    | 18 Na <sup>+</sup><br>0 Ca <sup>2+</sup><br>0 Cl <sup>-</sup>                      | 32 Na <sup>+</sup><br>19 Ca <sup>2+</sup><br>1 Cl <sup>-</sup>                     | 115 Na <sup>+</sup><br>168 Ca <sup>2+</sup><br>6 Cl <sup>-</sup>                   |
| <b>Total number of permeation events</b>                                 | 15                                                                                                                                               | 18                                                                                 | 52                                                                                 | 289                                                                                |

**Table S2.** Summary of external applied field simulation details of the TRPM5 channel. All simulations were conducted in a mono-cationic solution of either 150 mM NaCl, 150 mM KCl, or 150 mM CaCl<sub>2</sub>. In all simulations, the Ca<sup>2+</sup> cations occupying the Ca<sub>TMD</sub> were modelled, and remained bound for the duration of the simulations.

|                                                       |                                                                                                                     |                                                                                                                   |                                                                                                                     |                                                                                                            |
|-------------------------------------------------------|---------------------------------------------------------------------------------------------------------------------|-------------------------------------------------------------------------------------------------------------------|---------------------------------------------------------------------------------------------------------------------|------------------------------------------------------------------------------------------------------------|
| <b>Protein</b>                                        | TRPM5                                                                                                               |                                                                                                                   |                                                                                                                     |                                                                                                            |
| <b>Structure</b>                                      | 7MBS<br>(698-1020)                                                                                                  |                                                                                                                   |                                                                                                                     |                                                                                                            |
| <b>Force field</b>                                    | CHARMM36m                                                                                                           |                                                                                                                   |                                                                                                                     |                                                                                                            |
| <b>Water</b>                                          | TIP3P                                                                                                               |                                                                                                                   |                                                                                                                     |                                                                                                            |
| <b><i>In silico electrophysiology methodology</i></b> | External applied field                                                                                              |                                                                                                                   |                                                                                                                     |                                                                                                            |
| <b>Ion</b>                                            | 150 mM NaCl<br>267 Na <sup>+</sup> (CHARMM36m)<br>275 Cl <sup>-</sup> (CHARMM36m)<br>4 Ca <sup>2+</sup> (CHARMM36m) | 150 mM KCl<br>267 K <sup>+</sup> (CHARMM36m)<br>275 Cl <sup>-</sup> (CHARMM36m)<br>4 Ca <sup>2+</sup> (CHARMM36m) | 150 mM CaCl <sub>2</sub><br>271 Ca <sup>2+</sup> (Zhang <i>et al.</i> )<br>542 Cl <sup>-</sup> (CHARMM36m)          |                                                                                                            |
| <b>Independent simulations</b>                        | 3                                                                                                                   | 3                                                                                                                 | 3                                                                                                                   |                                                                                                            |
| <b>Total simulation time (μs)</b>                     | 0.75                                                                                                                | 0.75                                                                                                              | 0.75                                                                                                                |                                                                                                            |
| <b>Estimated voltage (mV)</b>                         | -340                                                                                                                | -340                                                                                                              | -340                                                                                                                |                                                                                                            |
| <b>Permeation events</b>                              | 83 Na <sup>+</sup><br>0 Cl <sup>-</sup>                                                                             | 34 K <sup>+</sup><br>0 Cl <sup>-</sup>                                                                            | 54 Ca <sup>2+</sup><br>0 Cl <sup>-</sup>                                                                            |                                                                                                            |
| <b>Total number of permeation events</b>              | 83                                                                                                                  | 34                                                                                                                | 54                                                                                                                  |                                                                                                            |
| <b>Protein</b>                                        | TRPM5                                                                                                               |                                                                                                                   |                                                                                                                     |                                                                                                            |
| <b>Structure</b>                                      | 7MBS<br>(698-1020)                                                                                                  |                                                                                                                   |                                                                                                                     |                                                                                                            |
| <b>Force field</b>                                    | CHARMM36m                                                                                                           |                                                                                                                   |                                                                                                                     |                                                                                                            |
| <b>Water</b>                                          | TIP3P                                                                                                               |                                                                                                                   |                                                                                                                     |                                                                                                            |
| <b><i>In silico electrophysiology methodology</i></b> | External applied field                                                                                              |                                                                                                                   |                                                                                                                     |                                                                                                            |
| <b>Ion</b>                                            | 150 mM NaCl<br>267 Na <sup>+</sup> (CHARMM36m)<br>275 Cl <sup>-</sup> (CHARMM36m)<br>4 Ca <sup>2+</sup> (CHARMM36m) | 150 mM CaCl <sub>2</sub><br>271 Ca <sup>2+</sup> (Zhang <i>et al.</i> )<br>542 Cl <sup>-</sup> (CHARMM36m)        | 150 mM NaCl<br>267 Na <sup>+</sup> (CHARMM36m)<br>275 Cl <sup>-</sup> (CHARMM36m)<br>4 Ca <sup>2+</sup> (CHARMM36m) | 150 mM CaCl <sub>2</sub><br>271 Ca <sup>2+</sup> (Zhang <i>et al.</i> )<br>542 Cl <sup>-</sup> (CHARMM36m) |
| <b>Independent simulations</b>                        | 3                                                                                                                   | 3                                                                                                                 | 3                                                                                                                   | 3                                                                                                          |
| <b>Total simulation time (μs)</b>                     | 0.75                                                                                                                | 0.75                                                                                                              | 0.75                                                                                                                | 0.75                                                                                                       |
| <b>Estimated voltage (mV)</b>                         | -50                                                                                                                 | -50                                                                                                               | -200                                                                                                                | -200                                                                                                       |
| <b>Permeation events</b>                              | 4 Na <sup>+</sup><br>0 Cl <sup>-</sup>                                                                              | 0 Ca <sup>2+</sup><br>0 Cl <sup>-</sup>                                                                           | 15 Na <sup>+</sup><br>0 Cl <sup>-</sup>                                                                             | 4 Ca <sup>2+</sup><br>0 Cl <sup>-</sup>                                                                    |
| <b>Total number of permeation events</b>              | 4                                                                                                                   | 0                                                                                                                 | 15                                                                                                                  | 4                                                                                                          |

**Table S3.** Summary of external applied field simulation details of the TRPM5 F904T channel. All simulations were conducted in a mono-cationic solution of either 150 mM NaCl, or 150 mM CaCl<sub>2</sub>. In all simulations, the Ca<sup>2+</sup> cations occupying the Ca<sub>TMD</sub> were modelled, and remained bound for the duration of the simulations.

|                                                |                                                                                 |                                                                |                                                                                 |                                                                |
|------------------------------------------------|---------------------------------------------------------------------------------|----------------------------------------------------------------|---------------------------------------------------------------------------------|----------------------------------------------------------------|
| <b>Protein</b>                                 | TRPM5 F904T                                                                     |                                                                |                                                                                 |                                                                |
| <b>Structure</b>                               | 7MBS<br>(698-1020)                                                              |                                                                |                                                                                 |                                                                |
| <b>Force field</b>                             | CHARMM36m                                                                       |                                                                |                                                                                 |                                                                |
| <b>Water</b>                                   | TIP3P                                                                           |                                                                |                                                                                 |                                                                |
| <b>In silico electrophysiology methodology</b> | External applied field                                                          |                                                                |                                                                                 |                                                                |
| <b>Ion</b>                                     | 150 mM NaCl<br>267 Na+ (CHARMM36m)<br>275 Cl- (CHARMM36m)<br>4 Ca2+ (CHARMM36m) | 150 mM CaCl2<br>271 Ca2+ (Zhang et al.)<br>542 Cl- (CHARMM36m) | 150 mM NaCl<br>267 Na+ (CHARMM36m)<br>275 Cl- (CHARMM36m)<br>4 Ca2+ (CHARMM36m) | 150 mM CaCl2<br>271 Ca2+ (Zhang et al.)<br>542 Cl- (CHARMM36m) |
| <b>Independent simulations</b>                 | 3                                                                               | 3                                                              | 3                                                                               | 3                                                              |
| <b>Total simulation time (μs)</b>              | 0.75                                                                            | 0.75                                                           | 0.75                                                                            | 0.75                                                           |
| <b>Estimated voltage (mV)</b>                  | -130                                                                            | -130                                                           | -200                                                                            | -200                                                           |
| <b>Permeation events</b>                       | 27 Na+<br>0 Cl-                                                                 | 13 Ca2+<br>0 Cl-                                               | 88 Na+<br>0 Cl-                                                                 | 28 Ca2+<br>0 Cl-                                               |
| <b>Total number of permeation events</b>       | 27                                                                              | 13                                                             | 88                                                                              | 28                                                             |

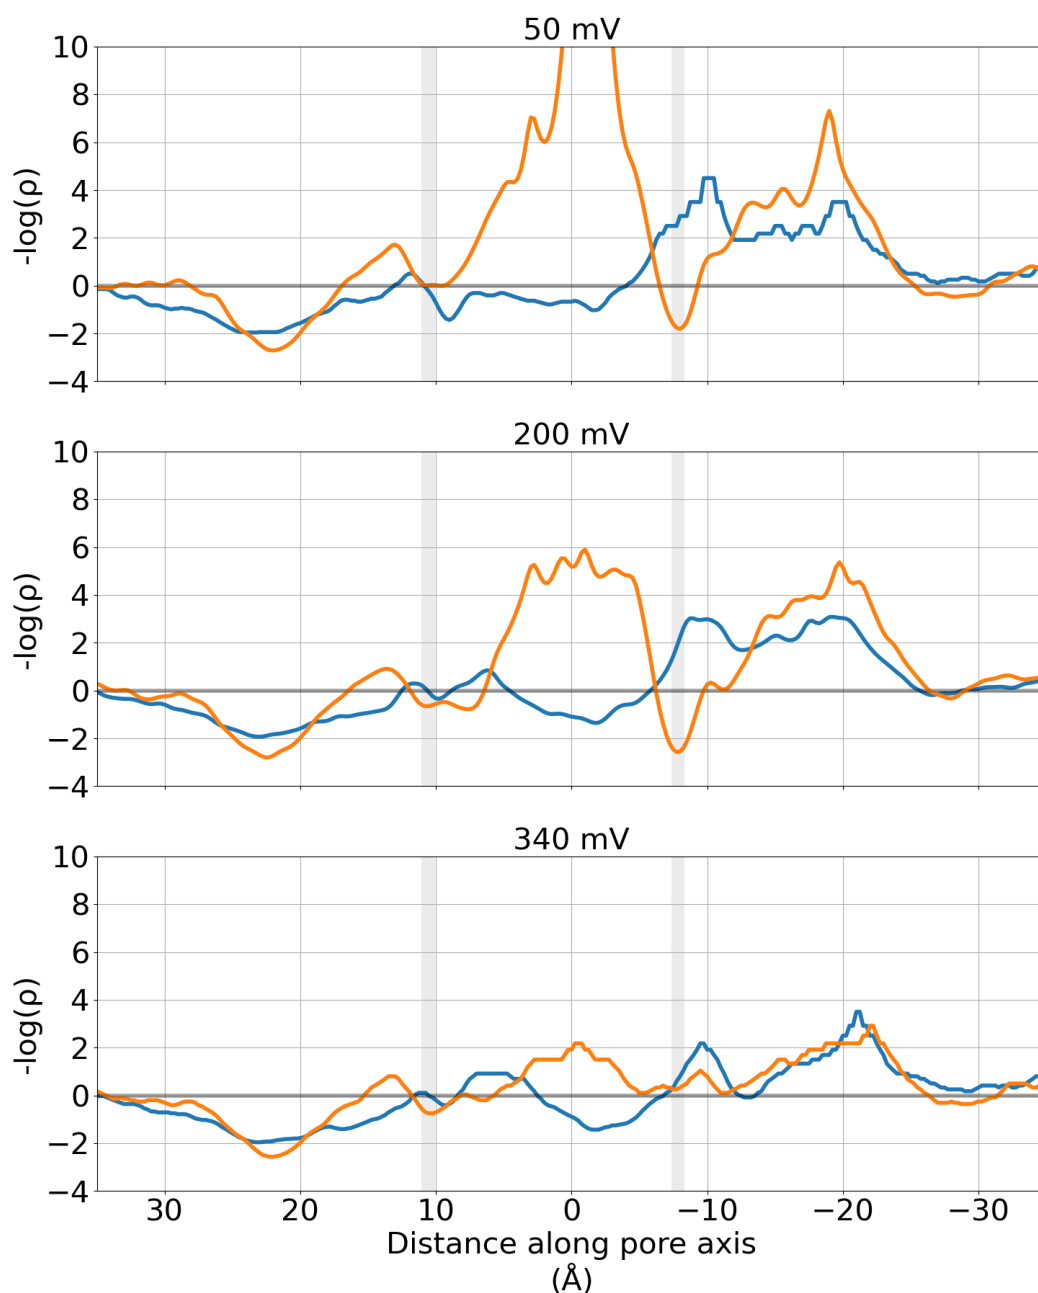

**Figure S1.** Negative logarithmic density profiles of permeating cations along the pore of the TRPM5 at different voltages. These simulations were performed in a mono-cationic solution, with an external applied electric field used to produce transmembrane voltages of  $\sim -50$  mV (*top*),  $\sim -200$  mV (*centre*), and  $\sim -340$  mV (*bottom*). The logarithmic ion densities represent quasi-free energies (with a nominal unit of kT). The location of the pore constrictions formed by Q906 (*upper*) and I966 (*lower*) are represented as grey regions. Both plots have been smoothed using a Gaussian filter with a sigma value of 2.

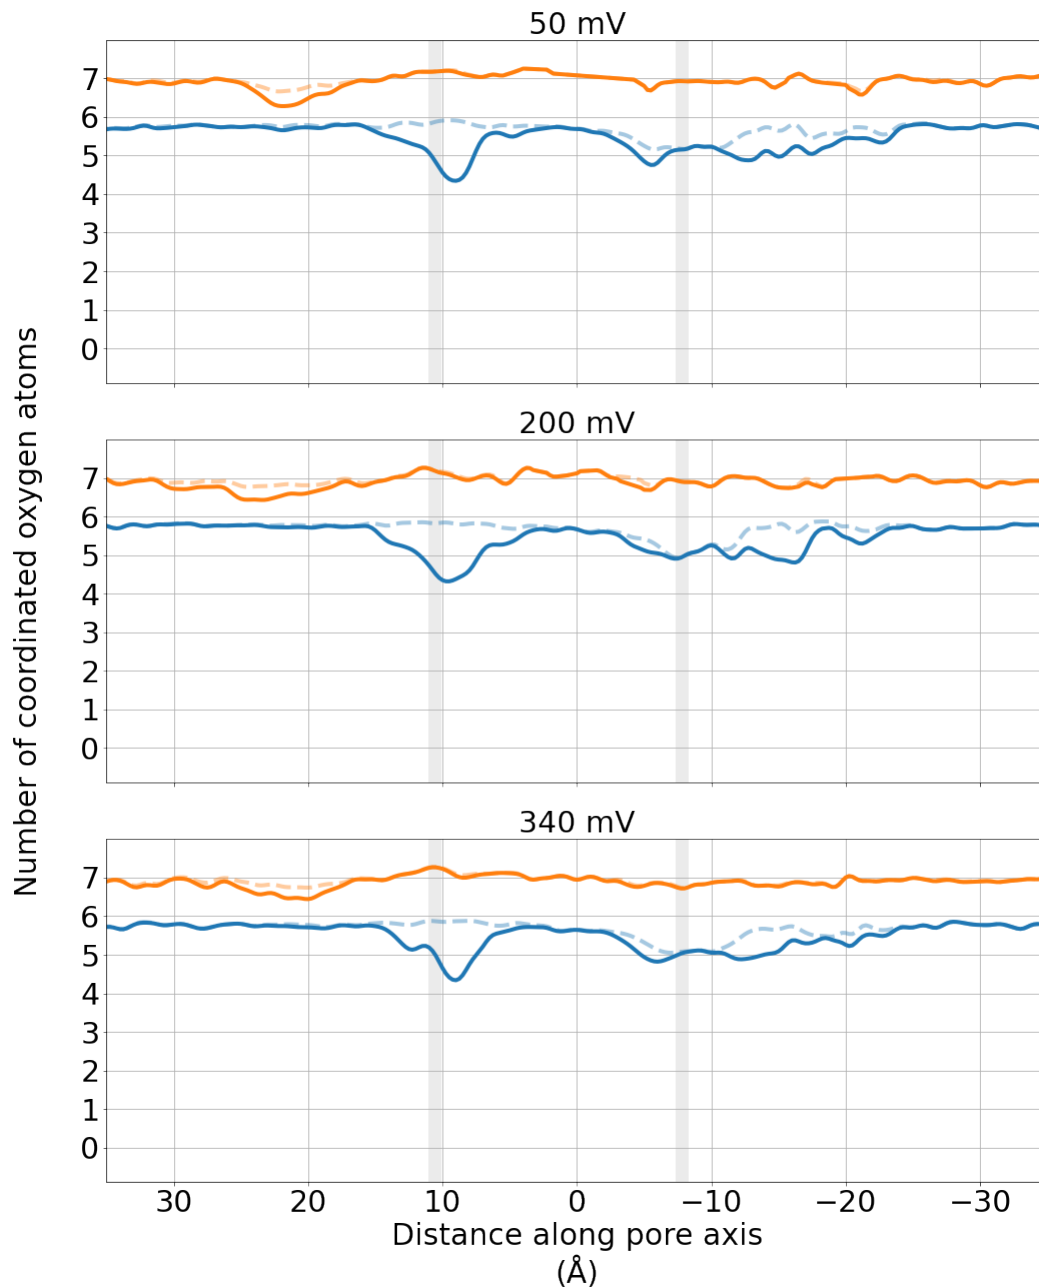

**Figure S2.** Solvation profiles of Na<sup>+</sup> (blue) and Ca<sup>2+</sup> (orange) cations through the TRPM5 pore. These simulations were performed in a mono-cationic solution, with an external applied electric field used to produce transmembrane voltages of ~ -50 mV (top), ~ -200 mV (centre), and ~ -340 mV (bottom). The mean number of oxygen atoms of water molecules (solid line) and of any oxygen atoms of any molecule (dashed line) within 3 Å of each permeating cation is plotted. The location of the pore constrictions formed by Q906 (upper) and I966 (lower) are represented as grey regions. All plots have been smoothed using a Gaussian filter with a sigma value of 2

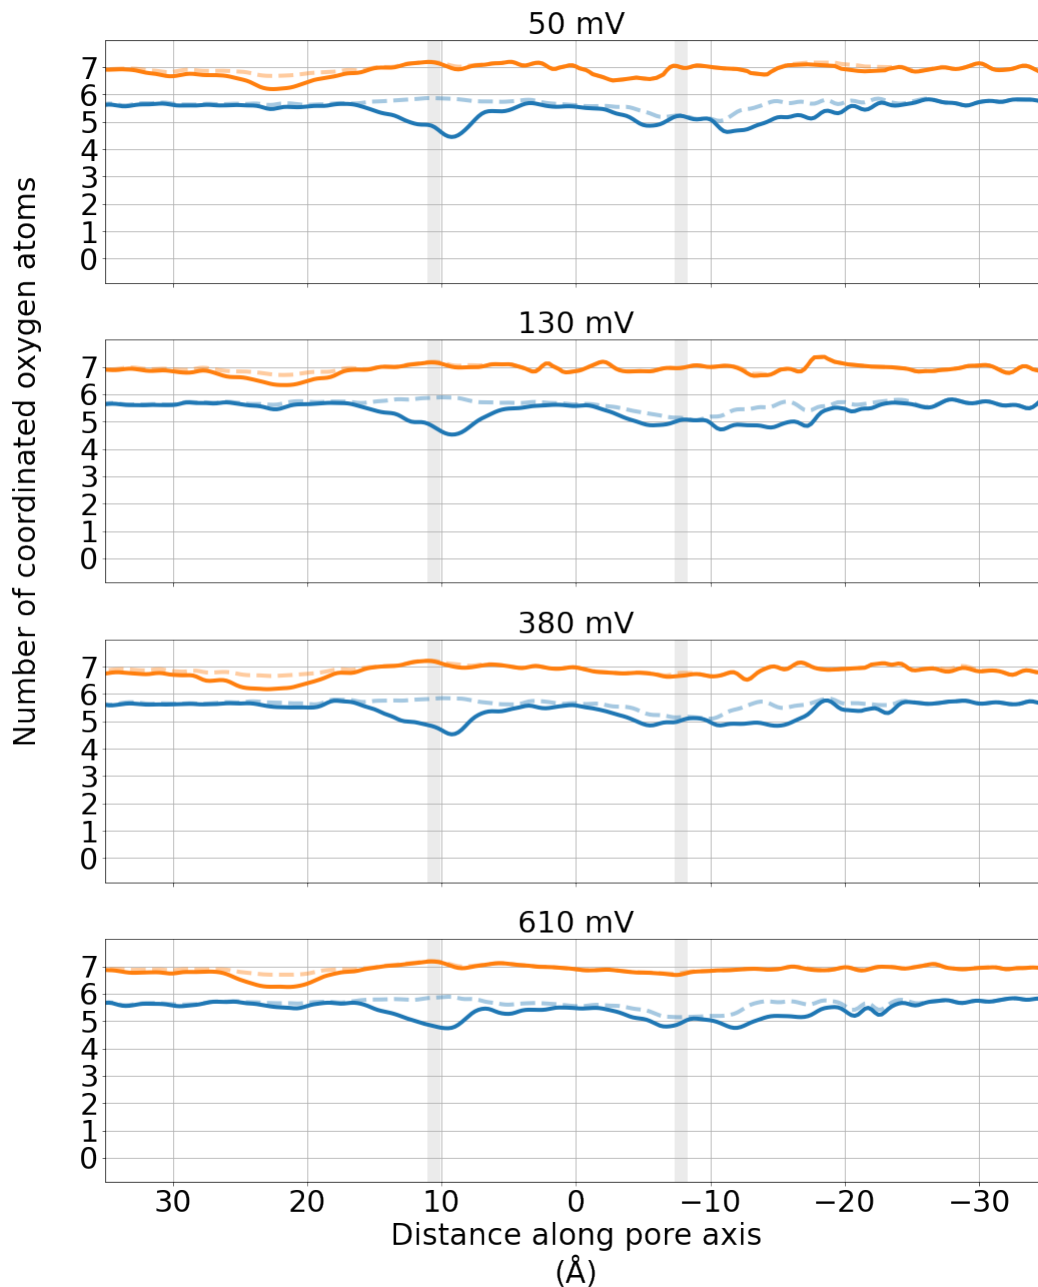

**Figure S3.** Solvation profiles of Na<sup>+</sup> (blue) and Ca<sup>2+</sup> (orange) cations through the TRPM5 pore. These simulations were performed in a di-cationic solution, with the CompEL methodology used to produce transmembrane voltages of ~ -50 mV (top), ~ -130 mV (second from top), ~ -380 mV (second from bottom), and ~ -610 mV (bottom). The mean number of oxygen atoms of water molecules (solid line) and of any oxygen atoms of any molecule (dashed line) within 3 Å of each permeating cation is plotted. The location of the pore constrictions formed by Q906 (upper) and I966 (lower) are represented as grey regions. All plots have been smoothed using a Gaussian filter with a sigma value of 2.
